# Supplementary material for: Low coordinate iron derivatives stabilized by a β-diketiminate mimic. Synthesis and coordination chemistry of enamidophosphinimine scaffolds to generate diiron dinitrogen complexes
Source: Royal Society of Chemistry journal article supplement (doi:10.1039/c6dt01673a), 2016-01-01
Supplement: c6dt01673a1.pdf [file c6dt01673a1.pdf]

Electronic Supporting Information

**Low Coordinate Iron Derivatives Stabilized by a  $\beta$ -Diketiminato Mimic. Synthesis and  
Coordination Chemistry of Enamidophosphinimine Scaffolds to Generate Diiron  
Dinitrogen Complexes**

Nicholas M. Hein, Tatsuya Suzuki, Takahiko Ogawa, and Michael D. Fryzuk\*

Department of Chemistry  
The University of British Columbia  
2036 Main Mall  
Vancouver, BC, CANADA  
V6T 1Z1

**Contents:**

|                             |    |
|-----------------------------|----|
| X-ray Diffraction Data..... | 2  |
| NMR Spectra.....            | 11 |
| Mössbauer Spectrum.....     | 41 |

## X-ray crystallographic data and collection parameters

**Table S1:** Crystal data and structure refinement for **4a**

|                                      |                                                                   |               |
|--------------------------------------|-------------------------------------------------------------------|---------------|
| Identification code                  | mf1117a                                                           |               |
| Empirical formula                    | C <sub>35</sub> H <sub>54</sub> N <sub>2</sub> PF <sub>6</sub> Br |               |
| Formula weight                       | 669.53                                                            |               |
| Temperature                          | 90K                                                               |               |
| Crystal size                         | 0.2 × 0.18 × 0.18 mm <sup>3</sup>                                 |               |
| Radiation                            | MoK $\alpha$ ( $\lambda$ = 0.71069 Å)                             |               |
| Crystal system                       | orthorhombic                                                      |               |
| Space group                          | Pbca                                                              |               |
| Unit cell dimensions                 | a=17.3586(5) Å                                                    | $\alpha$ =90° |
|                                      | b=16.9214(5) Å                                                    | $\beta$ =90°  |
|                                      | c=23.4188(7) Å                                                    | $\gamma$ =90° |
| Volume                               | 6878.8(4) Å <sup>3</sup>                                          |               |
| Z                                    | 8                                                                 |               |
| Density (calculated)                 | 1.293 g/cm <sup>3</sup>                                           |               |
| Absorption Coefficient               | 1.672 mm <sup>-1</sup>                                            |               |
| F(000)                               | 2832.0                                                            |               |
| 2 $\theta$ range for data collection | 3.478 to 55.02°                                                   |               |
| Index ranges                         | -22 ≤ h ≤ 15, -21 ≤ k ≤ 18, -24 ≤ l ≤ 30                          |               |
| Reflections collected                | 34340                                                             |               |
| Independent reflections              | 7900 [R <sub>int</sub> = 0.0476, R <sub>sigma</sub> = 0.0481]     |               |
| Data/restraints/parameters           | 7900/0/373                                                        |               |
| Completeness to $\theta$             | 99.8%                                                             |               |
| Goodness-of-fit on F <sup>2</sup>    | 1.038                                                             |               |
| Final R indexes [I ≥ 2 $\sigma$ (I)] | R <sub>1</sub> = 0.0528, wR <sub>2</sub> = 0.1149                 |               |
| Final R indexes [all data]           | R <sub>1</sub> = 0.0814, wR <sub>2</sub> = 0.1265                 |               |
| Largest diff. peak/hole              | 2.57/-2.34 eÅ <sup>-3</sup>                                       |               |

**Table S2:** Crystal data and structure refinement for **4b**

|                                      |                                                                |                       |
|--------------------------------------|----------------------------------------------------------------|-----------------------|
| Identification code                  | mf1189                                                         |                       |
| Empirical formula                    | C <sub>27</sub> H <sub>38</sub> BrFeN <sub>2</sub> P           |                       |
| Formula weight                       | 557.32                                                         |                       |
| Temperature                          | 90K                                                            |                       |
| Crystal size                         | 0.09 × 0.08 × 0.04 mm <sup>3</sup>                             |                       |
| Radiation                            | MoK $\alpha$ ( $\lambda$ = 0.71069 Å)                          |                       |
| Crystal system                       | triclinic                                                      |                       |
| Space group                          | P-1                                                            |                       |
| Unit cell dimensions                 | a=13.121(3) Å                                                  | $\alpha$ =90.837(4)°  |
|                                      | b=15.896(4) Å                                                  | $\beta$ =109.446(4)°  |
|                                      | c=16.706(4) Å                                                  | $\gamma$ =101.917(4)° |
| Volume                               | 3201.6(14) Å <sup>3</sup>                                      |                       |
| Z                                    | 4                                                              |                       |
| Density (calculated)                 | 1.156 g/cm <sup>3</sup>                                        |                       |
| Absorption Coefficient               | 1.783 mm <sup>-1</sup>                                         |                       |
| F(000)                               | 1160.0                                                         |                       |
| 2 $\theta$ range for data collection | 2.596 to 53.036°                                               |                       |
| Index ranges                         | -16 ≤ h ≤ 16, -19 ≤ k ≤ 19, -20 ≤ l ≤ 20                       |                       |
| Reflections collected                | 44303                                                          |                       |
| Independent reflections              | 13084 [R <sub>int</sub> = 0.1318, R <sub>sigma</sub> = 0.1376] |                       |
| Data/restraints/parameters           | 13084/0/545                                                    |                       |
| Completeness to $\theta$             | 98.5%                                                          |                       |
| Goodness-of-fit on F <sup>2</sup>    | 0.909                                                          |                       |
| Final R indexes [I ≥ 2 $\sigma$ (I)] | R <sub>1</sub> = 0.0827, wR <sub>2</sub> = 0.2030              |                       |
| Final R indexes [all data]           | R <sub>1</sub> = 0.1452, wR <sub>2</sub> = 0.2298              |                       |
| Largest diff. peak/hole              | 2.17/-1.04 eÅ <sup>-3</sup>                                    |                       |

**Table S3:** Crystal data and structure refinement for **4c**

|                                         |                                                                                               |                       |
|-----------------------------------------|-----------------------------------------------------------------------------------------------|-----------------------|
| Identification code                     | mf1098                                                                                        |                       |
| Empirical formula                       | C <sub>64</sub> H <sub>96</sub> N <sub>4</sub> P <sub>2</sub> Fe <sub>2</sub> Br <sub>2</sub> |                       |
| Formula weight                          | 1254.90                                                                                       |                       |
| Temperature                             | 90K                                                                                           |                       |
| Crystal size                            | 0.16 × 0.13 × 0.02 mm <sup>3</sup>                                                            |                       |
| Radiation                               | MoK $\alpha$ ( $\lambda$ = 0.71069 Å)                                                         |                       |
| Crystal system                          | triclinic                                                                                     |                       |
| Space group                             | P-1                                                                                           |                       |
| Unit cell dimensions                    | a=9.999(3) Å                                                                                  | $\alpha$ =62.101(6)°  |
|                                         | b= 13.544(5) Å                                                                                | $\beta$ = 72.296(7)°  |
|                                         | c= 13.905(5) Å                                                                                | $\gamma$ = 85.151(7)° |
| Volume                                  | 1581.7(9) Å <sup>3</sup>                                                                      |                       |
| Z                                       | 1                                                                                             |                       |
| Density (calculated)                    | 1.317 g/cm <sup>3</sup>                                                                       |                       |
| Absorption Coefficient                  | 1.813 mm <sup>-1</sup>                                                                        |                       |
| F(000)                                  | 660.0                                                                                         |                       |
| 2 $\theta$ range for data collection    | 3.41 to 54.974°                                                                               |                       |
| Index ranges                            | -12 ≤ h ≤ 12, -17 ≤ k ≤ 17, -18 ≤ l ≤ 18                                                      |                       |
| Reflections collected                   | 24646                                                                                         |                       |
| Independent reflections                 | 7109 [ $R_{\text{int}}$ = 0.0767, $R_{\text{sigma}}$ = 0.0838]                                |                       |
| Data/restraints/parameters              | 7109/0/345                                                                                    |                       |
| Completeness to $\theta$                | 99.2%                                                                                         |                       |
| Goodness-of-fit on F <sup>2</sup>       | 1.074                                                                                         |                       |
| Final R indexes [ $I \geq 2\sigma(I)$ ] | $R_1$ = 0.0670, $wR_2$ = 0.1588                                                               |                       |
| Final R indexes [all data]              | $R_1$ = 0.1023, $wR_2$ = 0.1715                                                               |                       |
| Largest diff. peak/hole                 | 1.57/-0.67 eÅ <sup>-3</sup>                                                                   |                       |

**Table S4:** Crystal data and structure refinement for **5a**

|                                         |                                                                                |                         |
|-----------------------------------------|--------------------------------------------------------------------------------|-------------------------|
| Identification code                     | mf1148                                                                         |                         |
| Empirical formula                       | C <sub>70</sub> H <sub>108</sub> N <sub>6</sub> P <sub>2</sub> Fe <sub>2</sub> |                         |
| Formula weight                          | 1207.26                                                                        |                         |
| Temperature                             | 90 K                                                                           |                         |
| Crystal size                            | 0.1 × 0.08 × 0.03 mm <sup>3</sup>                                              |                         |
| Radiation                               | MoK $\alpha$ ( $\lambda$ = 0.71069 Å)                                          |                         |
| Crystal system                          | monoclinic                                                                     |                         |
| Space group                             | P2 <sub>1</sub> /c                                                             |                         |
| Unit cell dimensions                    | a=10.3990(6) Å                                                                 | $\alpha$ =90°           |
|                                         | b= 28.6698(15) Å                                                               | $\beta$ = 100.9200(10)° |
|                                         | c= 22.9617(13) Å                                                               | $\gamma$ = 90°          |
| Volume                                  | 6721.8(6) Å <sup>3</sup>                                                       |                         |
| Z                                       | 4                                                                              |                         |
| Density (calculated)                    | 1.193 g/cm <sup>3</sup>                                                        |                         |
| Absorption Coefficient                  | 0.523 mm <sup>-1</sup>                                                         |                         |
| F(000)                                  | 2608.0                                                                         |                         |
| 2 $\theta$ range for data collection    | 2.298 to 55.11°                                                                |                         |
| Index ranges                            | -13 ≤ h ≤ 13, -37 ≤ k ≤ 20, -24 ≤ l ≤ 29                                       |                         |
| Reflections collected                   | 62062                                                                          |                         |
| Independent reflections                 | 15498 [R <sub>int</sub> = 0.0760, R <sub>sigma</sub> = 0.0902]                 |                         |
| Data/restraints/parameters              | 15498/0/745                                                                    |                         |
| Completeness to $\theta$                | 99.7%                                                                          |                         |
| Goodness-of-fit on F <sup>2</sup>       | 1.001                                                                          |                         |
| Final R indexes [ $I \geq 2\sigma(I)$ ] | R <sub>1</sub> = 0.0479, wR <sub>2</sub> = 0.0833                              |                         |
| Final R indexes [all data]              | R <sub>1</sub> = 0.0986, wR <sub>2</sub> = 0.0965                              |                         |
| Largest diff. peak/hole                 | 0.48/-0.39 eÅ <sup>-3</sup>                                                    |                         |

**Table S5:** Crystal data and structure refinement for **5b**

|                                         |                                                                  |                       |
|-----------------------------------------|------------------------------------------------------------------|-----------------------|
| Identification code                     | mf1203                                                           |                       |
| Empirical formula                       | C <sub>46</sub> H <sub>67</sub> N <sub>3</sub> P <sub>2</sub> Fe |                       |
| Formula weight                          | 779.81                                                           |                       |
| Temperature                             | 90 K                                                             |                       |
| Crystal size                            | 0.24 × 0.03 × 0.025 mm <sup>3</sup>                              |                       |
| Radiation                               | MoK $\alpha$ ( $\lambda$ = 0.71073 Å)                            |                       |
| Crystal system                          | monoclinic                                                       |                       |
| Space group                             | P2 <sub>1</sub> /n                                               |                       |
| Unit cell dimensions                    | a=19.562(3) Å                                                    | $\alpha$ =90°         |
|                                         | b= 11.2091(14) Å                                                 | $\beta$ = 112.138(3)° |
|                                         | c= 20.674(3) Å                                                   | $\gamma$ = 90°        |
| Volume                                  | 4199.1(9) Å <sup>3</sup>                                         |                       |
| Z                                       | 4                                                                |                       |
| Density (calculated)                    | 1.234 g/cm <sup>3</sup>                                          |                       |
| Absorption Coefficient                  | 0.471 mm <sup>-1</sup>                                           |                       |
| F(000)                                  | 1680.0                                                           |                       |
| 2 $\theta$ range for data collection    | 2.444 to 55.158°                                                 |                       |
| Index ranges                            | -25 ≤ h ≤ 24, -10 ≤ k ≤ 14, -26 ≤ l ≤ 26                         |                       |
| Reflections collected                   | 37081                                                            |                       |
| Independent reflections                 | 9688 [R <sub>int</sub> = 0.1579, R <sub>sigma</sub> = 0.1611]    |                       |
| Data/restraints/parameters              | 9688/0/483                                                       |                       |
| Completeness to $\theta$                | 99.4%                                                            |                       |
| Goodness-of-fit on F <sup>2</sup>       | 0.974                                                            |                       |
| Final R indexes [ $I \geq 2\sigma(I)$ ] | R <sub>1</sub> = 0.0807, wR <sub>2</sub> = 0.1703                |                       |
| Final R indexes [all data]              | R <sub>1</sub> = 0.1598, wR <sub>2</sub> = 0.2062                |                       |
| Largest diff. peak/hole                 | 1.23/-0.89 eÅ <sup>-3</sup>                                      |                       |

**Table S6:** Crystal data and structure refinement for **5c**

|                                         |                                                               |                         |
|-----------------------------------------|---------------------------------------------------------------|-------------------------|
| Identification code                     | mf987                                                         |                         |
| Empirical formula                       | $C_{64}H_{93.15}Fe_2N_6P_2$                                   |                         |
| Formula weight                          | 1120.23                                                       |                         |
| Temperature                             | 90 K                                                          |                         |
| Crystal size                            | $0.21 \times 0.014 \times 0.014 \text{ mm}^3$                 |                         |
| Radiation                               | MoK $\alpha$ ( $\lambda = 0.71069 \text{ \AA}$ )              |                         |
| Crystal system                          | monoclinic                                                    |                         |
| Space group                             | $C_2/c$                                                       |                         |
| Unit cell dimensions                    | $a=21.642(5) \text{ \AA}$                                     | $\alpha=90^\circ$       |
|                                         | $b=20.337(5) \text{ \AA}$                                     | $\beta=98.831(5)^\circ$ |
|                                         | $c=16.105(5) \text{ \AA}$                                     | $\gamma=90^\circ$       |
| Volume                                  | $7004(3) \text{ \AA}^3$                                       |                         |
| Z                                       | 4                                                             |                         |
| Density (calculated)                    | $1.062 \text{ g/cm}^3$                                        |                         |
| Absorption Coefficient                  | $0.498 \text{ mm}^{-1}$                                       |                         |
| F(000)                                  | 2405.0                                                        |                         |
| 2 $\theta$ range for data collection    | 2.764 to $50.8^\circ$                                         |                         |
| Index ranges                            | $-24 \leq h \leq 26, -24 \leq k \leq 24, -19 \leq l \leq 19$  |                         |
| Reflections collected                   | 25483                                                         |                         |
| Independent reflections                 | 6423 [ $R_{\text{int}} = 0.0696, R_{\text{sigma}} = 0.0688$ ] |                         |
| Data/restraints/parameters              | 6423/0/362                                                    |                         |
| Completeness to $\theta$                | 99.6%                                                         |                         |
| Goodness-of-fit on $F^2$                | 1.071                                                         |                         |
| Final R indexes [ $I \geq 2\sigma(I)$ ] | $R_1 = 0.0626, wR_2 = 0.1623$                                 |                         |
| Final R indexes [all data]              | $R_1 = 0.0868, wR_2 = 0.1704$                                 |                         |
| Largest diff. peak/hole                 | $1.25/-0.47 \text{ e\AA}^{-3}$                                |                         |

**Table S7:** Crystal data and structure refinement for **6**

|                                         |                                                               |                       |
|-----------------------------------------|---------------------------------------------------------------|-----------------------|
| Identification code                     | mfl134_a                                                      |                       |
| Empirical formula                       | C <sub>35.5</sub> H <sub>55.5</sub> FeN <sub>2</sub> P        |                       |
| Formula weight                          | 597.14                                                        |                       |
| Temperature                             | 90.15 K                                                       |                       |
| Crystal size                            | 0.52 × 0.45 × 0.41 mm <sup>3</sup>                            |                       |
| Radiation                               | MoK $\alpha$ ( $\lambda$ = 0.71069 Å)                         |                       |
| Crystal system                          | monoclinic                                                    |                       |
| Space group                             | C <sub>2</sub> /c                                             |                       |
| Unit cell dimensions                    | a=26.340(3) Å                                                 | $\alpha$ =90°         |
|                                         | b= 11.8226(16) Å                                              | $\beta$ = 106.786(3)° |
|                                         | c= 24.864(3) Å                                                | $\gamma$ = 90°        |
| Volume                                  | 7413.1(17) Å <sup>3</sup>                                     |                       |
| Z                                       | 8                                                             |                       |
| Density (calculated)                    | 1.070 g/cm <sup>3</sup>                                       |                       |
| Absorption Coefficient                  | 0.473 mm <sup>-1</sup>                                        |                       |
| F(000)                                  | 2588.0                                                        |                       |
| 2 $\theta$ range for data collection    | 3.23 to 50.36°                                                |                       |
| Index ranges                            | -31 ≤ h ≤ 21, -14 ≤ k ≤ 14, -22 ≤ l ≤ 29                      |                       |
| Reflections collected                   | 51121                                                         |                       |
| Independent reflections                 | 6599 [R <sub>int</sub> = 0.0389, R <sub>sigma</sub> = 0.0248] |                       |
| Data/restraints/parameters              | 6599/651/683                                                  |                       |
| Completeness to $\theta$                | 99.0%                                                         |                       |
| Goodness-of-fit on F <sup>2</sup>       | 1.065                                                         |                       |
| Final R indexes [ $I \geq 2\sigma(I)$ ] | R <sub>1</sub> = 0.1319, wR <sub>2</sub> = 0.3464             |                       |
| Final R indexes [all data]              | R <sub>1</sub> = 0.1487, wR <sub>2</sub> = 0.3532             |                       |
| Largest diff. peak/hole                 | 0.67/-1.76 eÅ <sup>-3</sup>                                   |                       |



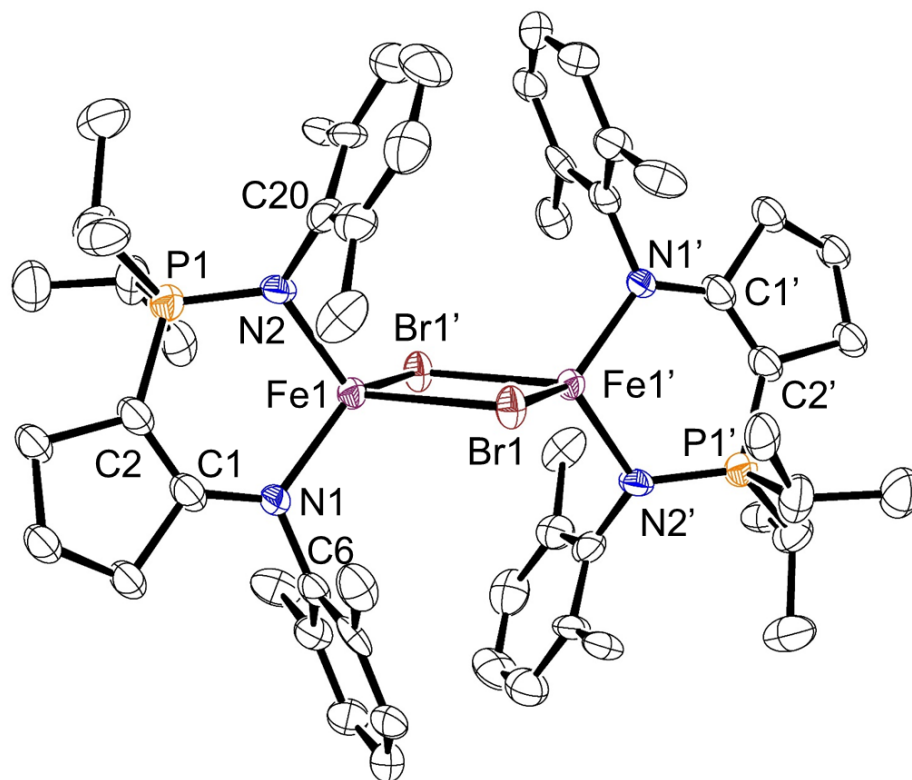

**Figure S1:** ORTEP drawing of the solid-state molecular structure of **4b** (ellipsoids at 50% probability level). All hydrogen atoms have been omitted for clarity. Selected bond lengths (Å), angles (deg), and torsion angles (deg): C1-N1: 1.339(9), C1-C2: 1.358(11), C2-P1: 1.753(8), P1-N2: 1.645(6), N1-Fe1: 1.988(6), N2-Fe1: 2.009(6), Fe1-Br1: 2.5361(13), Fe1-Br1': 2.5415(13), Fe1-Fe1': 3.614(2), C1-N1-C6: 117.9(6), P1-N2-C20: 126.0(5), N1-Fe1-N2: 102.4(2), Br1-Fe1-Br1': 89.25(4), N1-Fe1-Br1: 112.08(17), N1-Fe1-Br1': 122.32(17), N2-Fe1-Br1: 114.42(18), N2-Fe1-Br1': 116.61(18), C1-C2-P1-N2: 25.8(9).

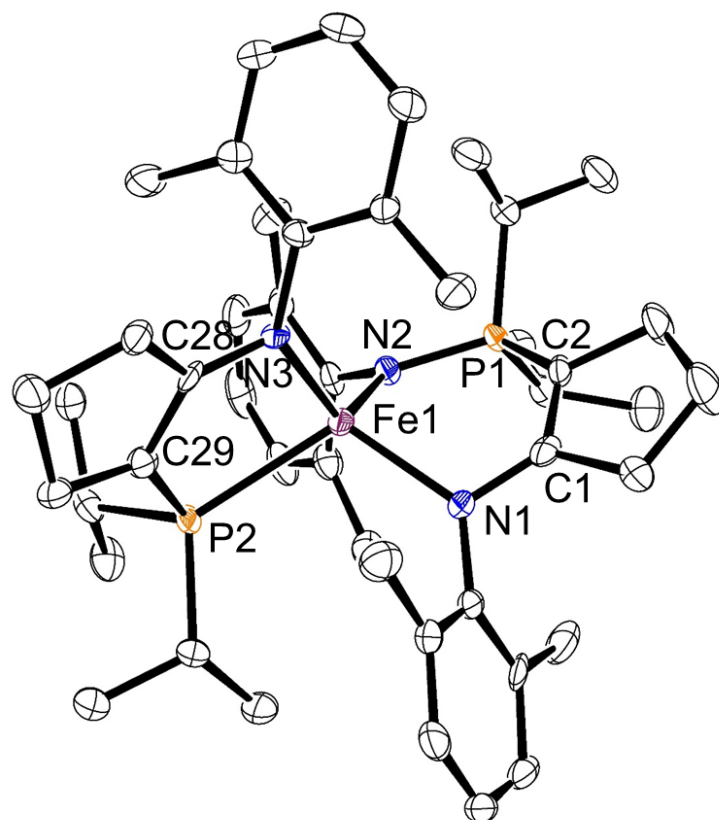

**Figure S2:** ORTEP drawing of the solid-state molecular structure of **5b** (ellipsoids at 50% probability level). All hydrogen atoms have been omitted for clarity. Selected bond lengths (Å), angles (deg): C1-N1: 1.368(5), C1-C2: 1.374(6), C2-P1: 1.747(5), P1-N2: 1.628(4), C28-N3: 1.359(5), C28-C29: 1.381(5), P2-C29: 1.772(4), N1-Fe1: 2.052(3), N2-Fe1: 2.023(4), N3-Fe1: 2.017(3), P2-Fe1: 2.4981(12), N1-Fe1-N2: 98.37(14), N2-Fe1-N3: 122.76(14), N1-Fe1-P2: 111.93(9), N3-Fe1-P2: 86.07(10).

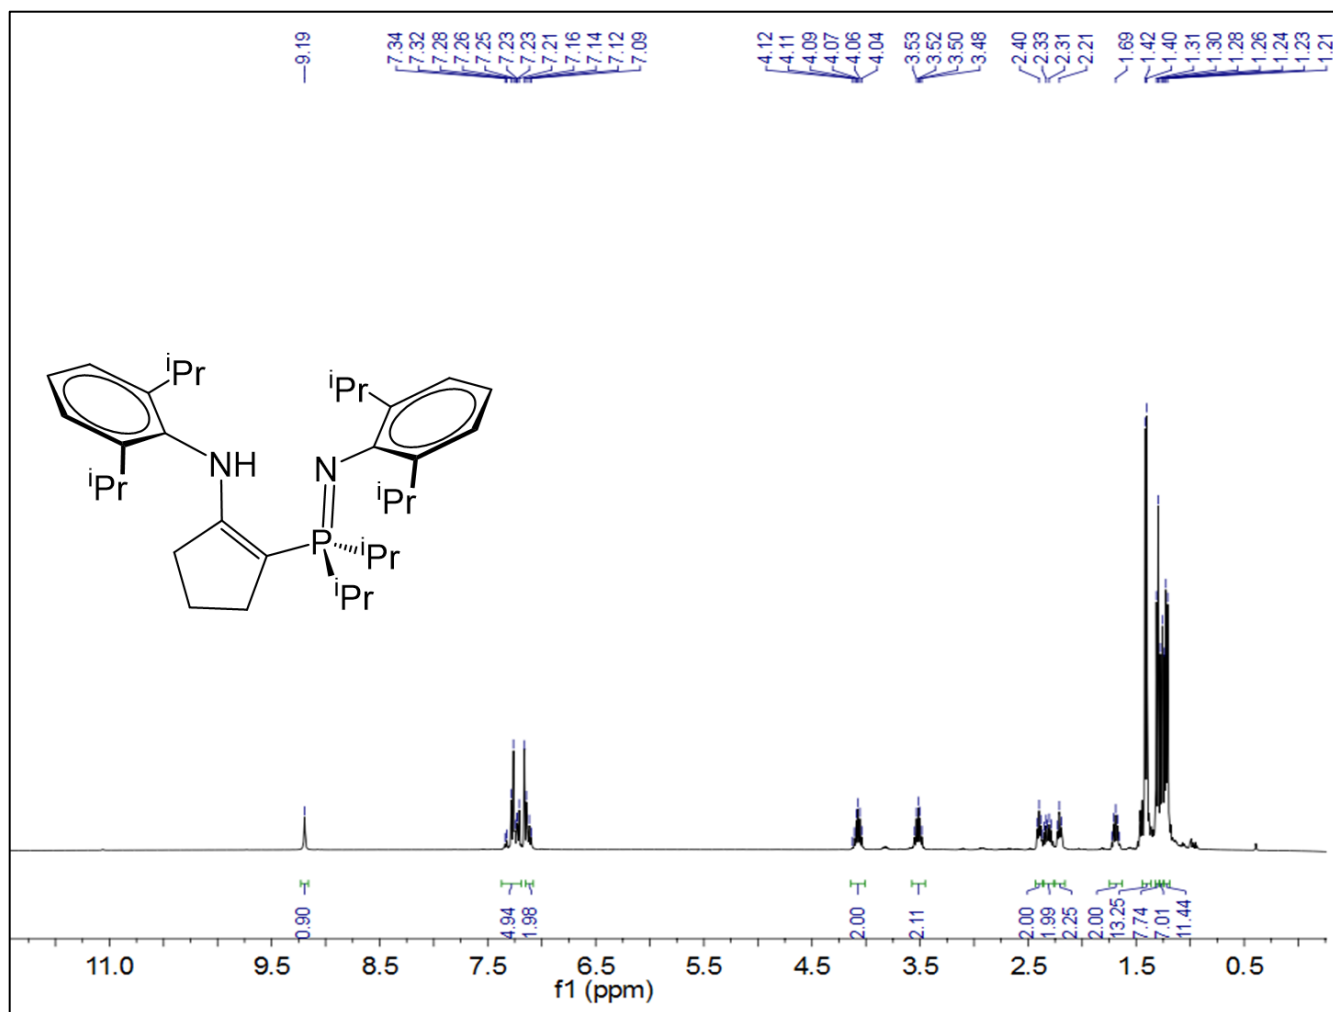

**Figure S3:**  $^1\text{H}$  NMR spectrum for  $[\text{CY}^5\text{NpN}^{\text{DIPP},\text{DIPP}}]\text{H } \mathbf{2a}$  (400 MHz,  $d_6$ -benzene, 298 K).

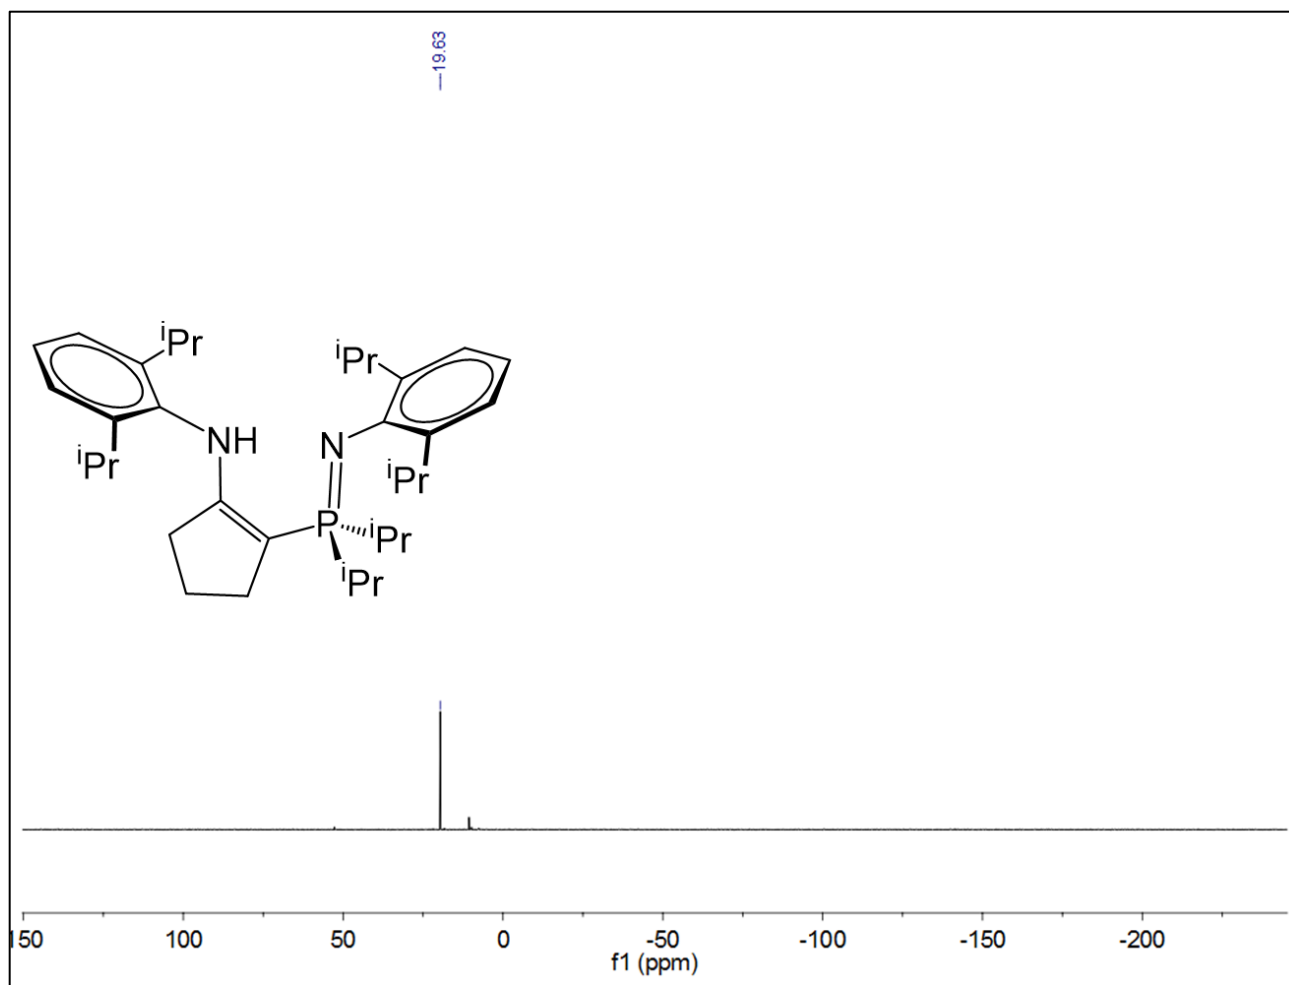

**Figure S4:**  $^{31}\text{P}\{^1\text{H}\}$  NMR spectrum for  $[\text{CY5}\text{NpN}^{\text{DIPP,DIPP}}]\text{H } \mathbf{2a}$  (161 MHz,  $d_6$ -benzene, 298 K).

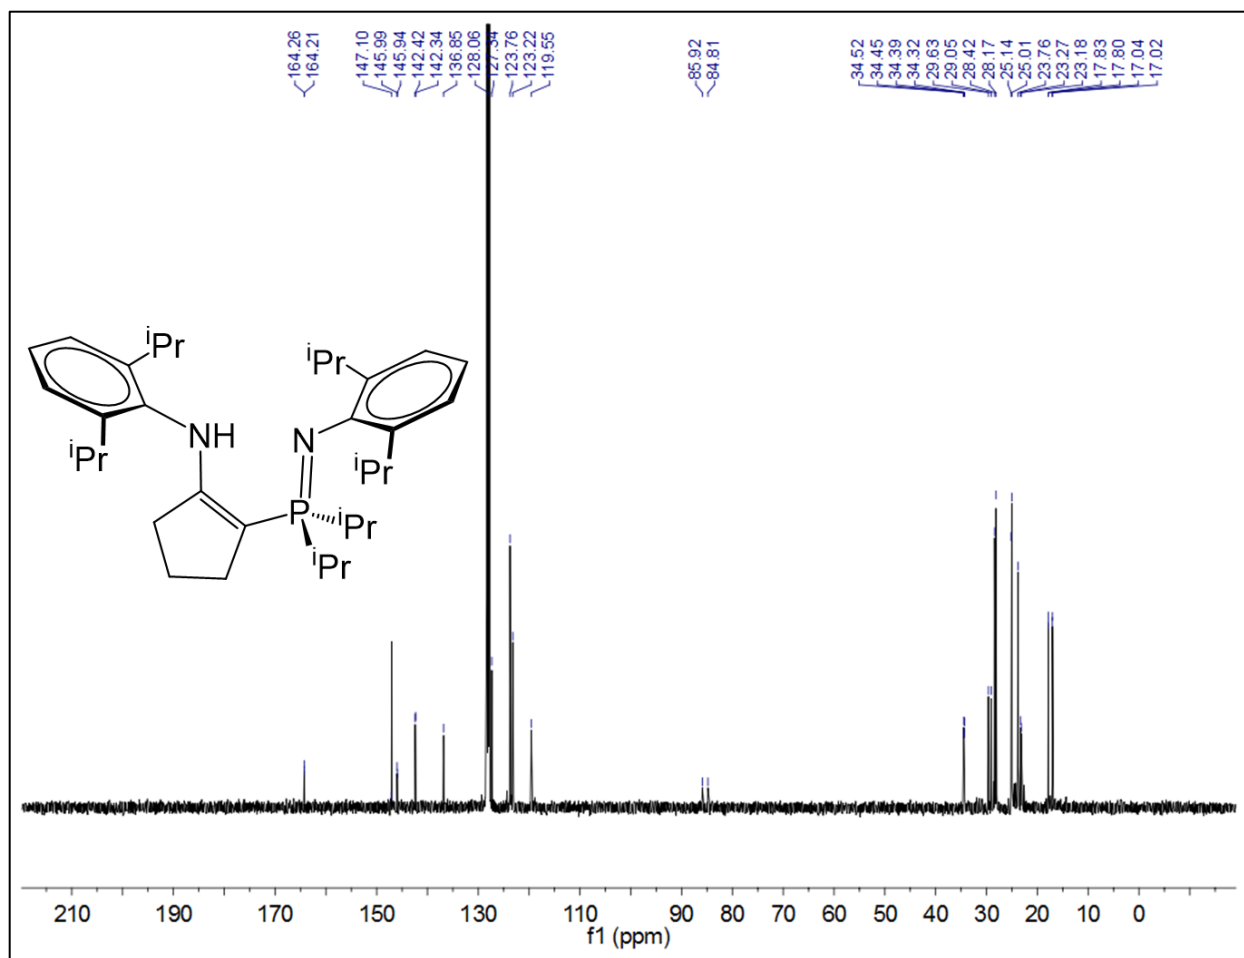

**Figure S5:**  $^{13}\text{C}\{^1\text{H}\}$  NMR spectrum for  $[\text{CY}^5\text{NpN}^{\text{DIPP,DIPP}}]\text{H } \mathbf{2a}$  (101 MHz,  $d_6$ -benzene, 298 K).

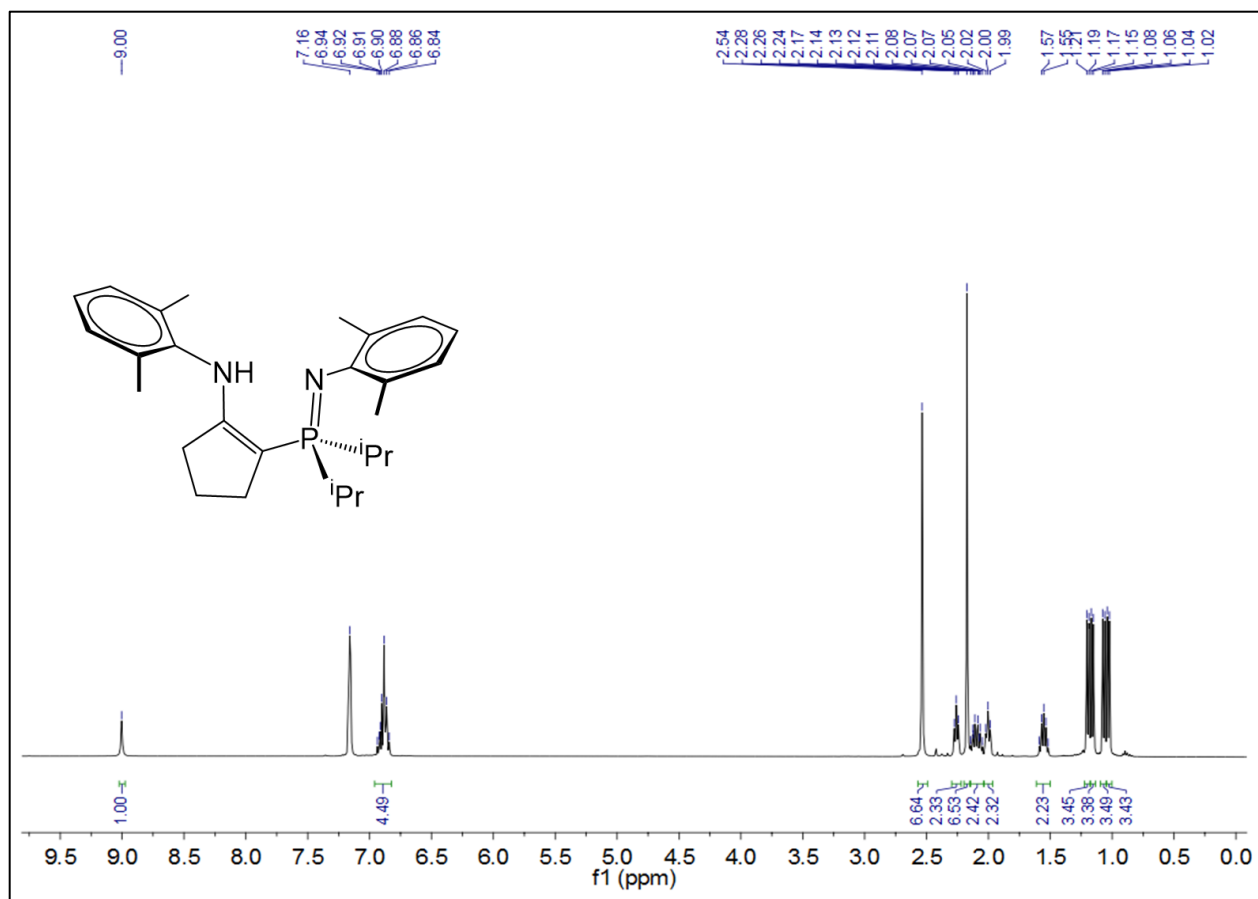

**Figure S6:**  $^1\text{H}$  NMR spectrum for  $[\text{CY}^5\text{NpN}^{\text{DMP,DMP}}]\text{H}$  **2b** (400 MHz,  $d_6$ -benzene, 298 K).

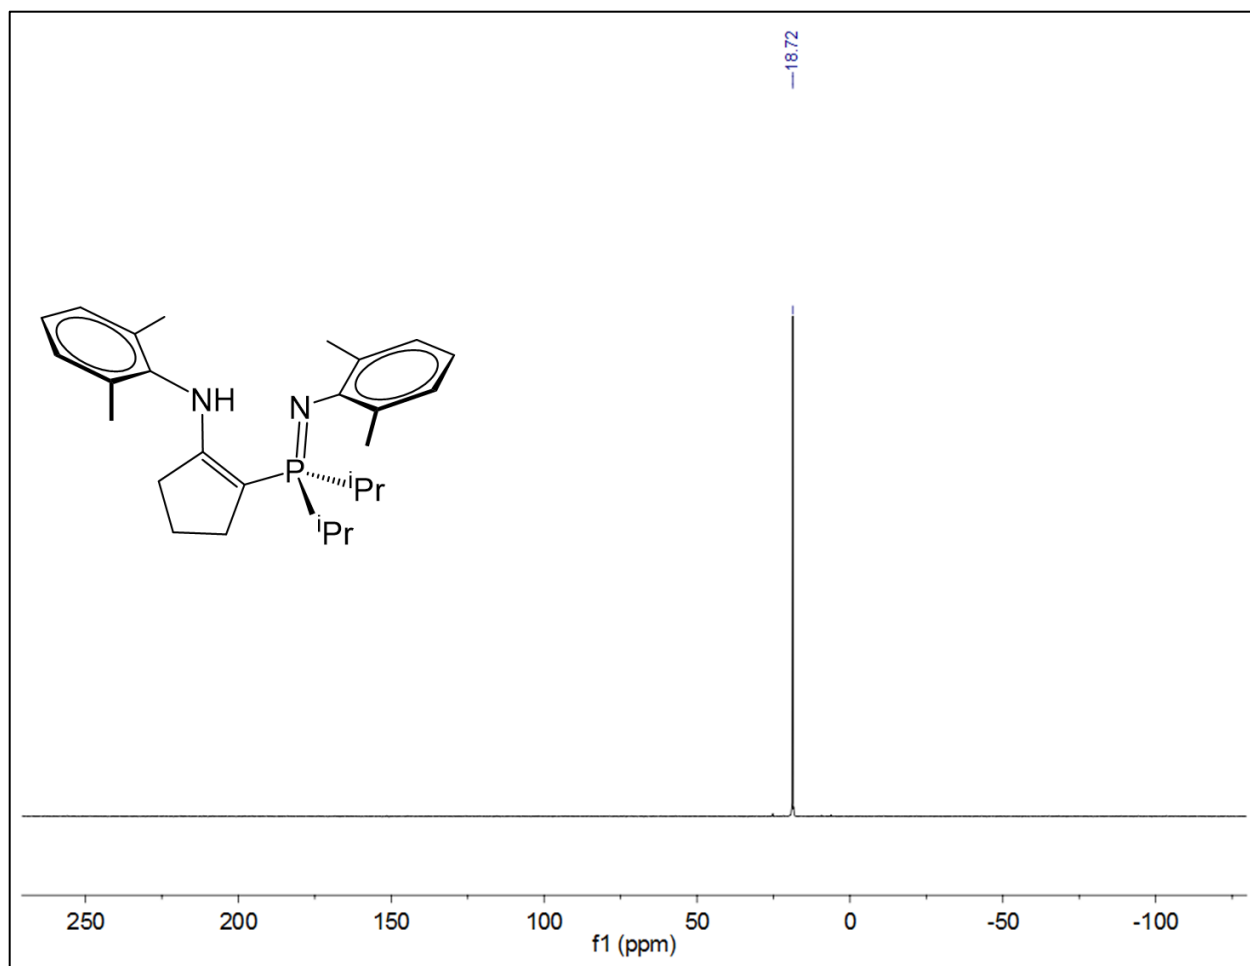

**Figure S7:**  $^{31}\text{P}\{^1\text{H}\}$  NMR spectrum for  $[\text{CY5}\text{NpN}^{\text{DMP,DMP}}]\text{H } \mathbf{2b}$  (121 MHz,  $d_6$ -benzene, 298 K).

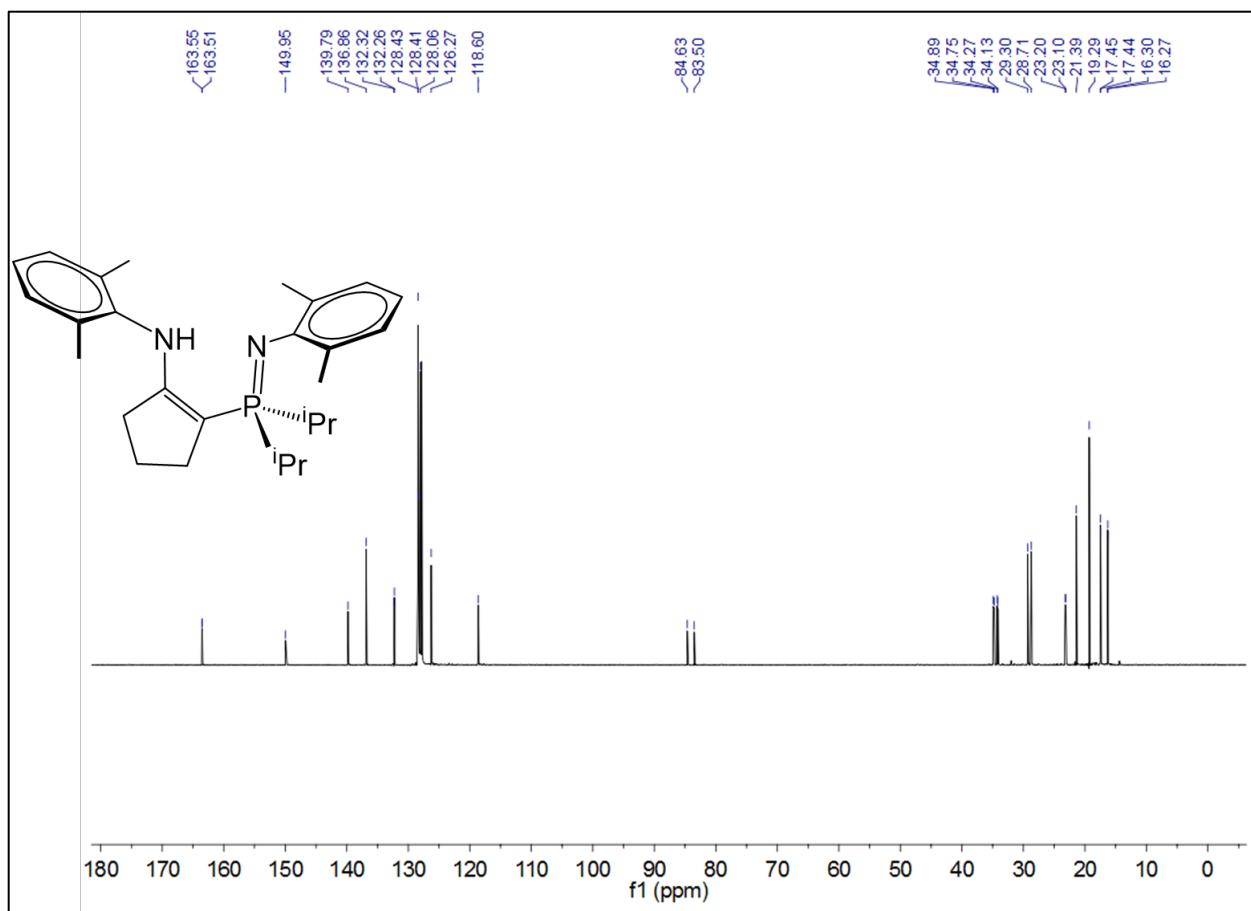

**Figure S8:**  $^{13}\text{C}\{^1\text{H}\}$  NMR spectrum for  $[\text{CY}^5\text{NpN}^{\text{DMP},\text{DMP}}]\text{H } \mathbf{2b}$  (101 MHz,  $d_6$ -benzene, 298 K).



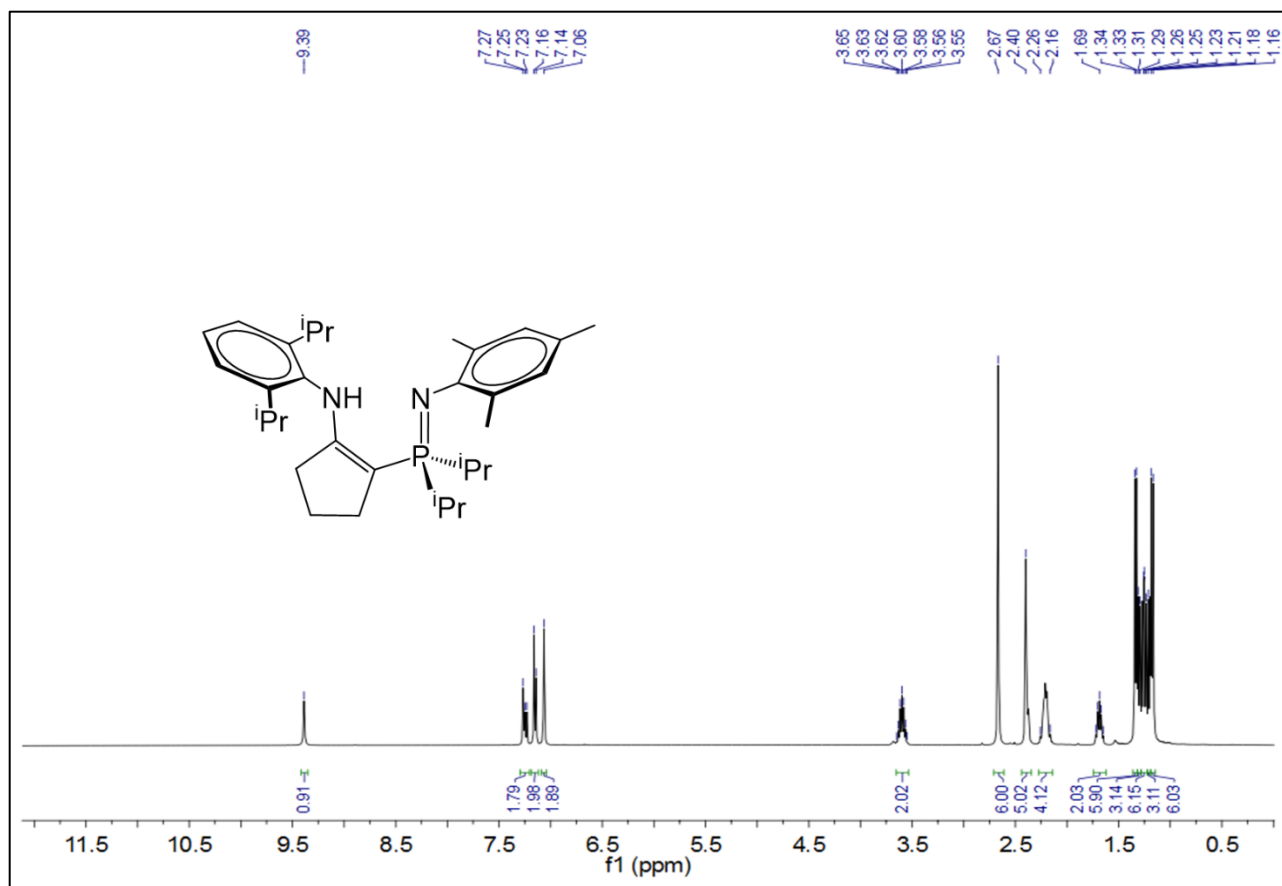

**Figure S9:**  $^1\text{H}$  NMR spectrum for  $[\text{CY}^5\text{NpN}^{\text{DIPP,Mes}}]\text{H } \mathbf{2c}$  (400 MHz,  $d_6$ -benzene, 298 K).

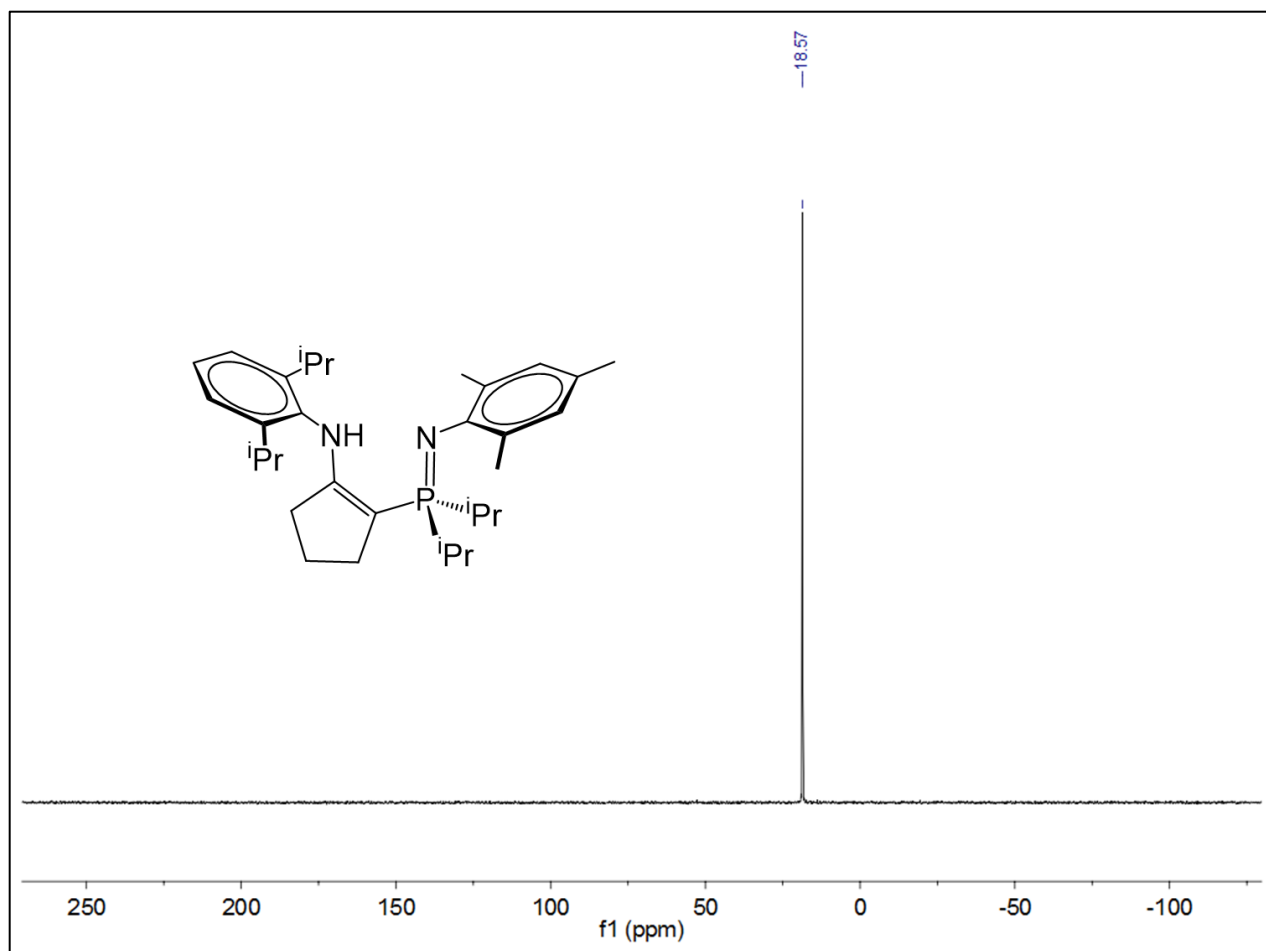

**Figure S10:**  $^{31}\text{P}\{^1\text{H}\}$  NMR spectrum for  $[\text{CY5NpN}^{\text{DIPP,Mes}}]\text{H}$  **2c** (121 MHz,  $d_6$ -benzene, 298 K).

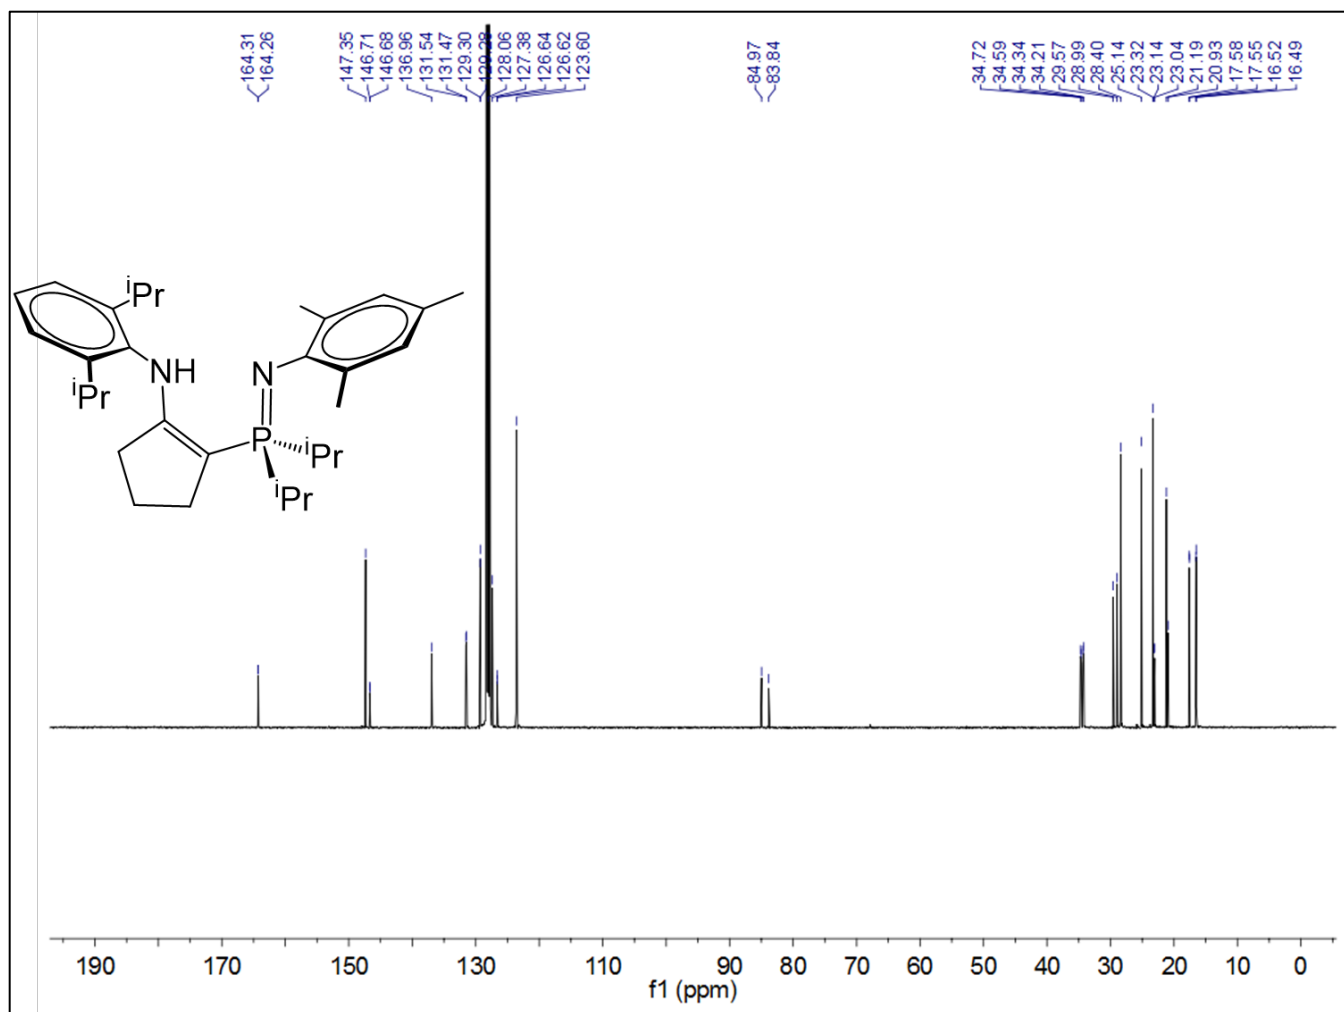

**Figure S11:**  $^{13}\text{C}\{^1\text{H}\}$  NMR spectrum for  $[\text{CY}^5\text{NpN}^{\text{DIPP,Mes}}]\text{H } \mathbf{2c}$  (101 MHz,  $d_6$ -benzene, 298 K).

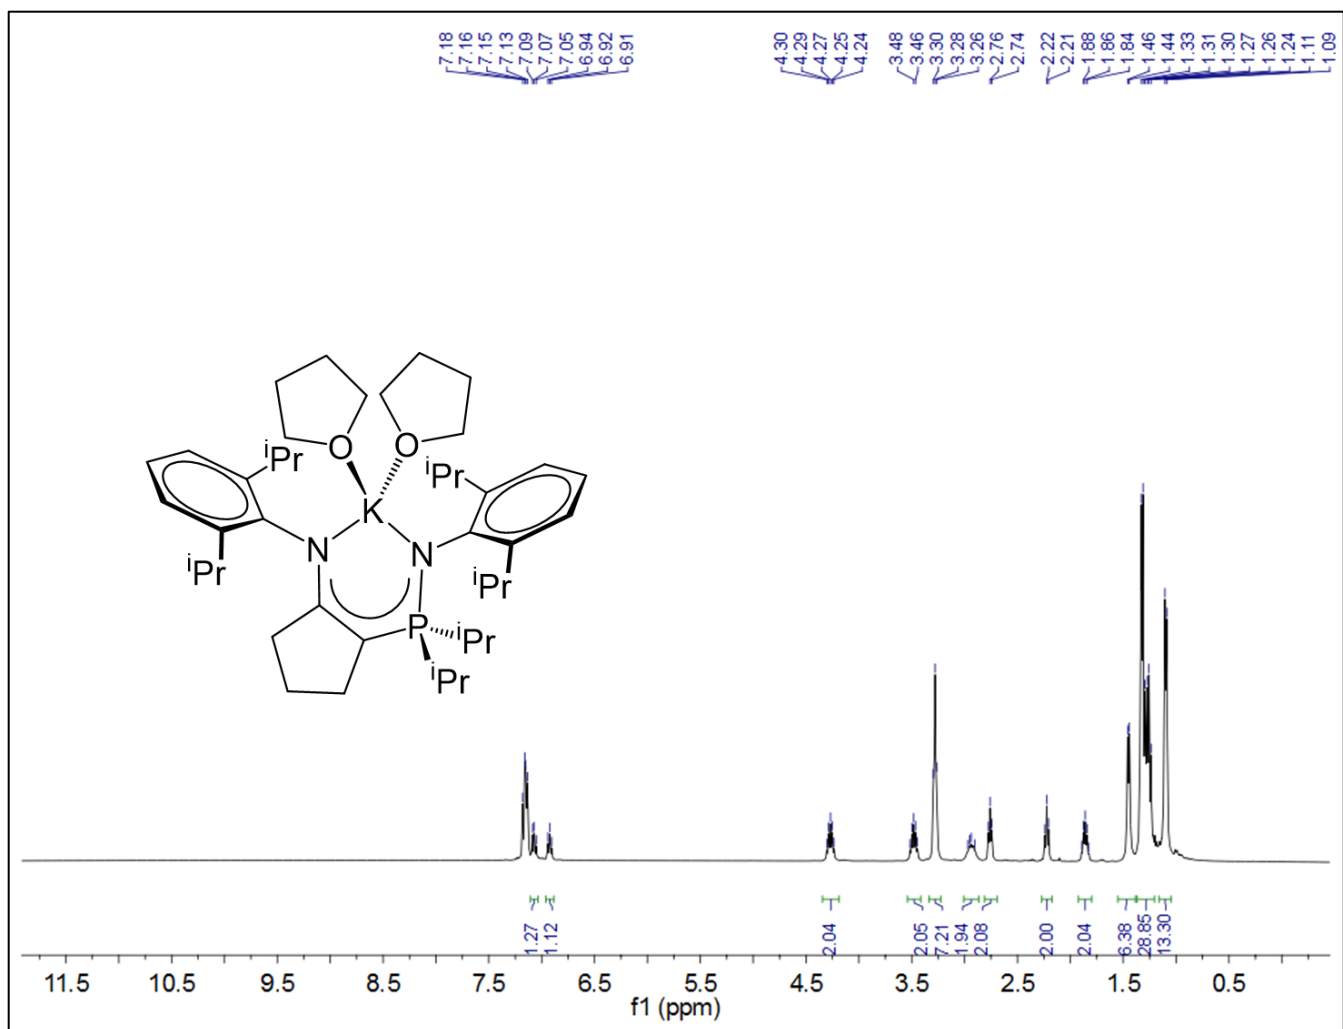

**Figure S12:**  $^1\text{H}$  NMR spectrum for  $[\text{CY}^5\text{NpN}^{\text{DIPP,DIPP}}]\text{K}(\text{THF})_2$  **3a** (400 MHz,  $d_6$ -benzene, 298 K).

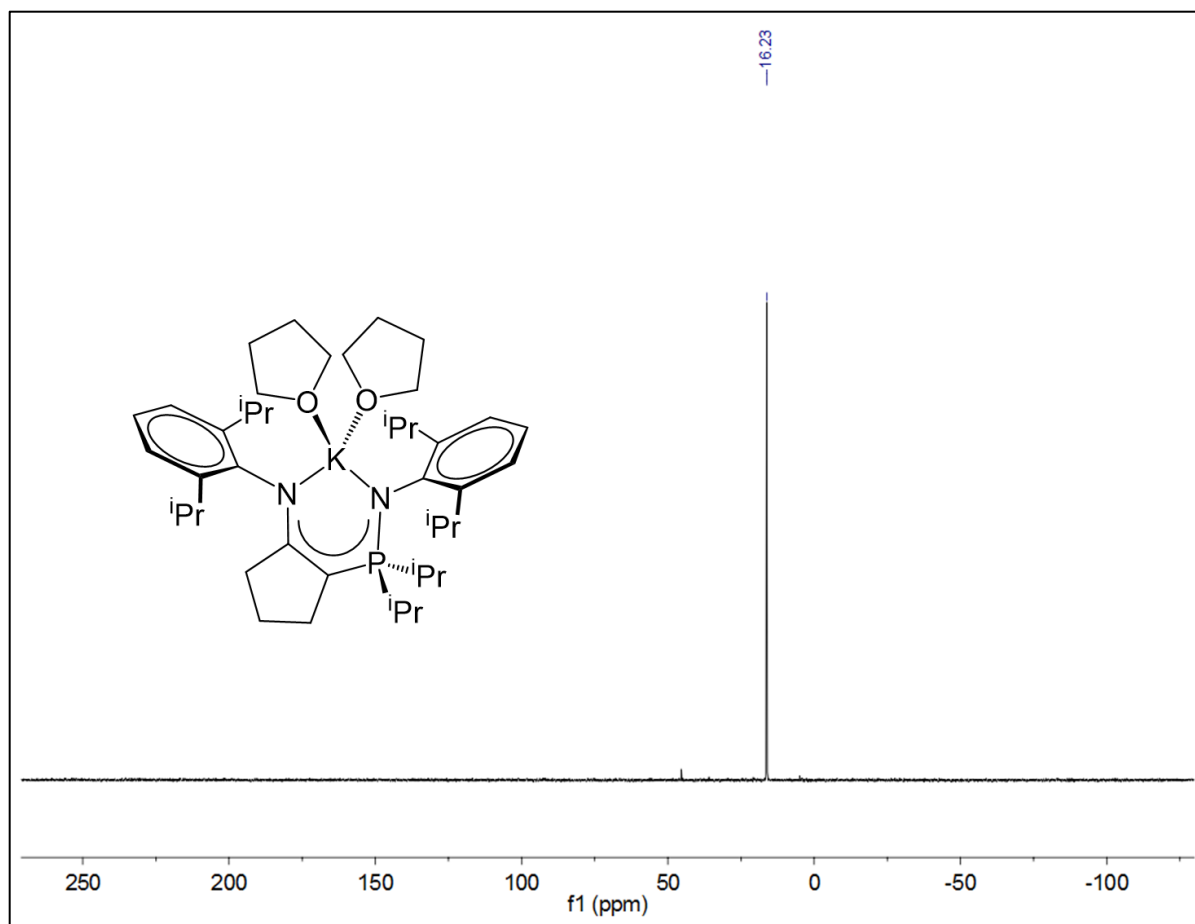

**Figure S13:**  $^{31}\text{P}\{^1\text{H}\}$  NMR spectrum for  $[\text{CY5NpN}^{\text{DIPP,DIPP}}]\text{K}(\text{THF})_2$  **3a**  
(161 MHz,  $d_6$ -benzene, 298 K).

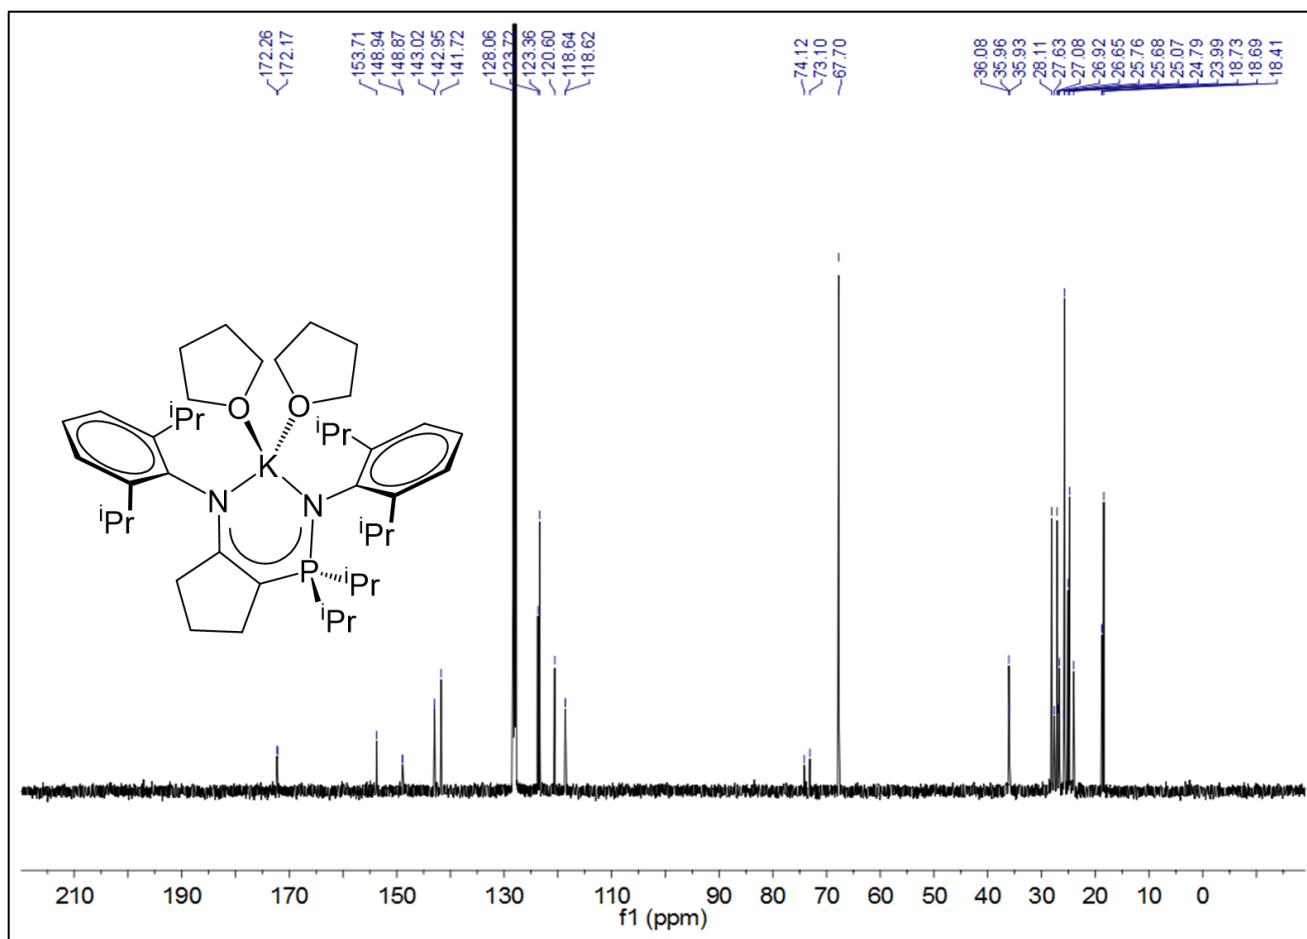

**Figure S14:**  $^{13}\text{C}\{^1\text{H}\}$  NMR spectrum for  $[\text{CY5NpN}^{\text{DIPP,DIPP}}]\text{K}(\text{THF})_2$  **3a**  
(101 MHz,  $d_6$ -benzene, 298 K).

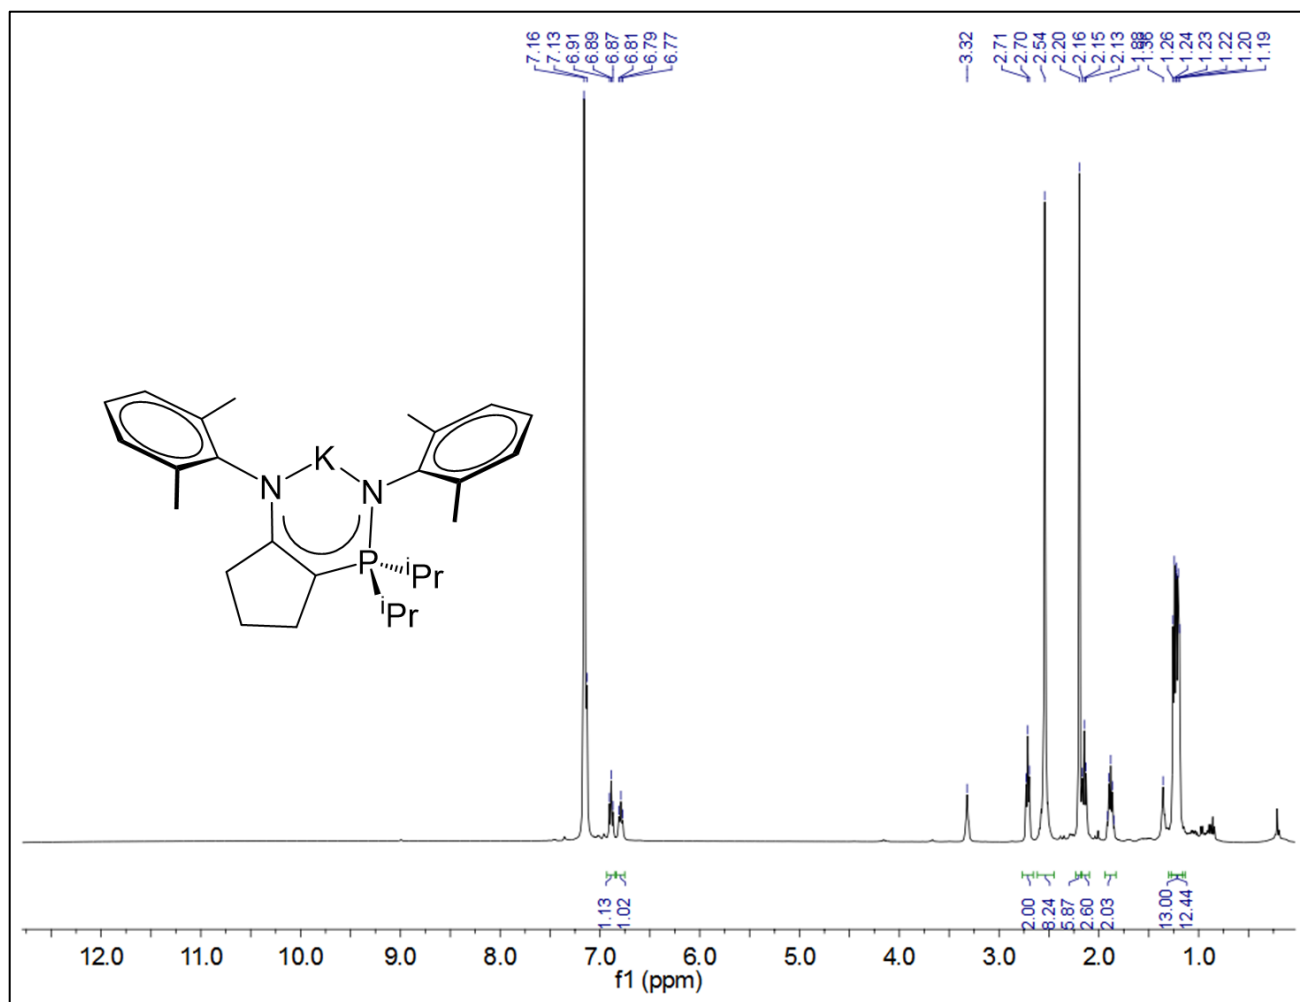

**Figure S15:** <sup>1</sup>H NMR spectrum for [<sup>CY5</sup>NpN<sup>DMP,DMP</sup>]**3b** (400 MHz, *d*<sub>6</sub>-benzene, 298 K).

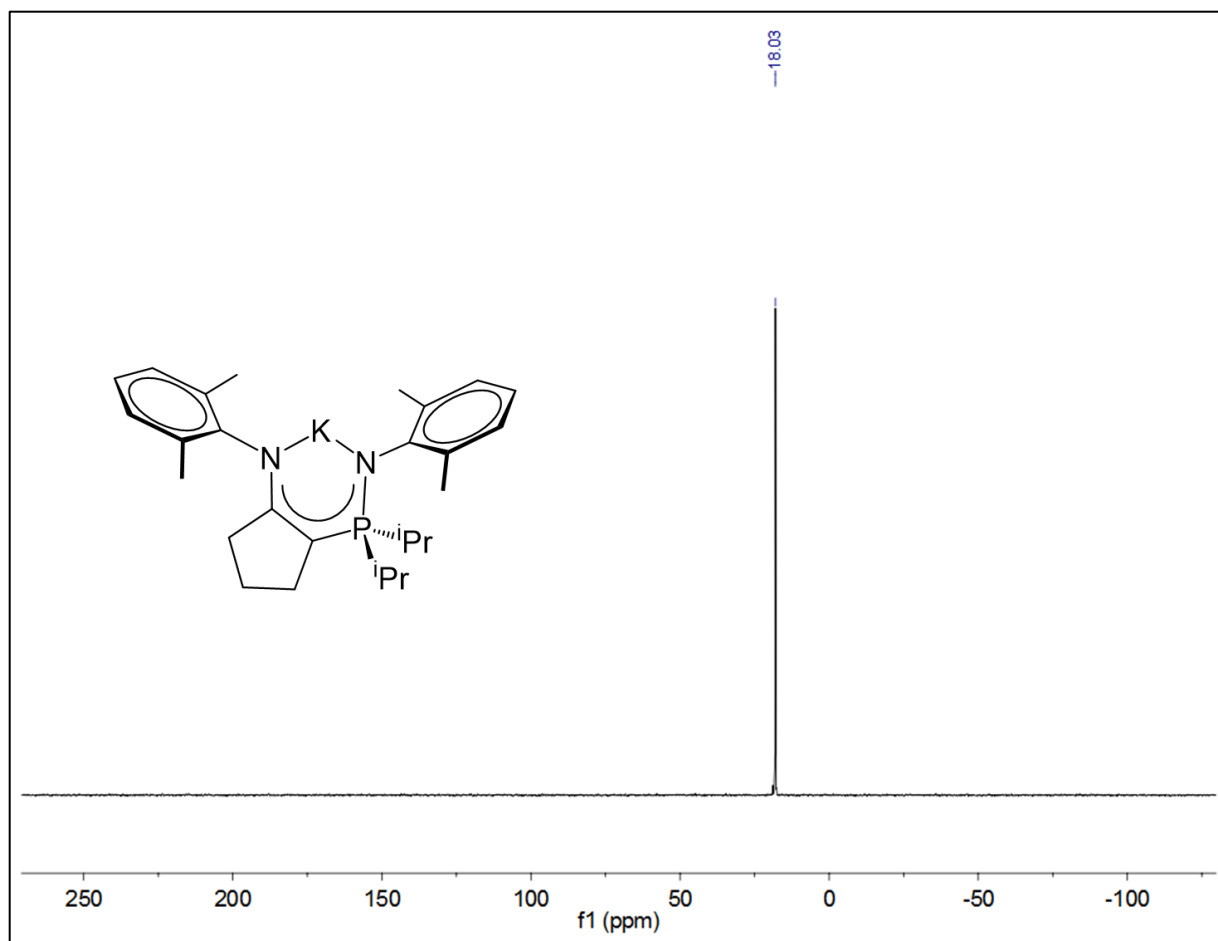

**Figure S16:**  $^{31}\text{P}\{^1\text{H}\}$  NMR spectrum for  $[\text{CY5NpN}^{\text{DMP,DMP}}]\text{K}(\text{THF})_{0.25}$  **3b**  
(161 MHz,  $d_6$ -benzene, 298 K).



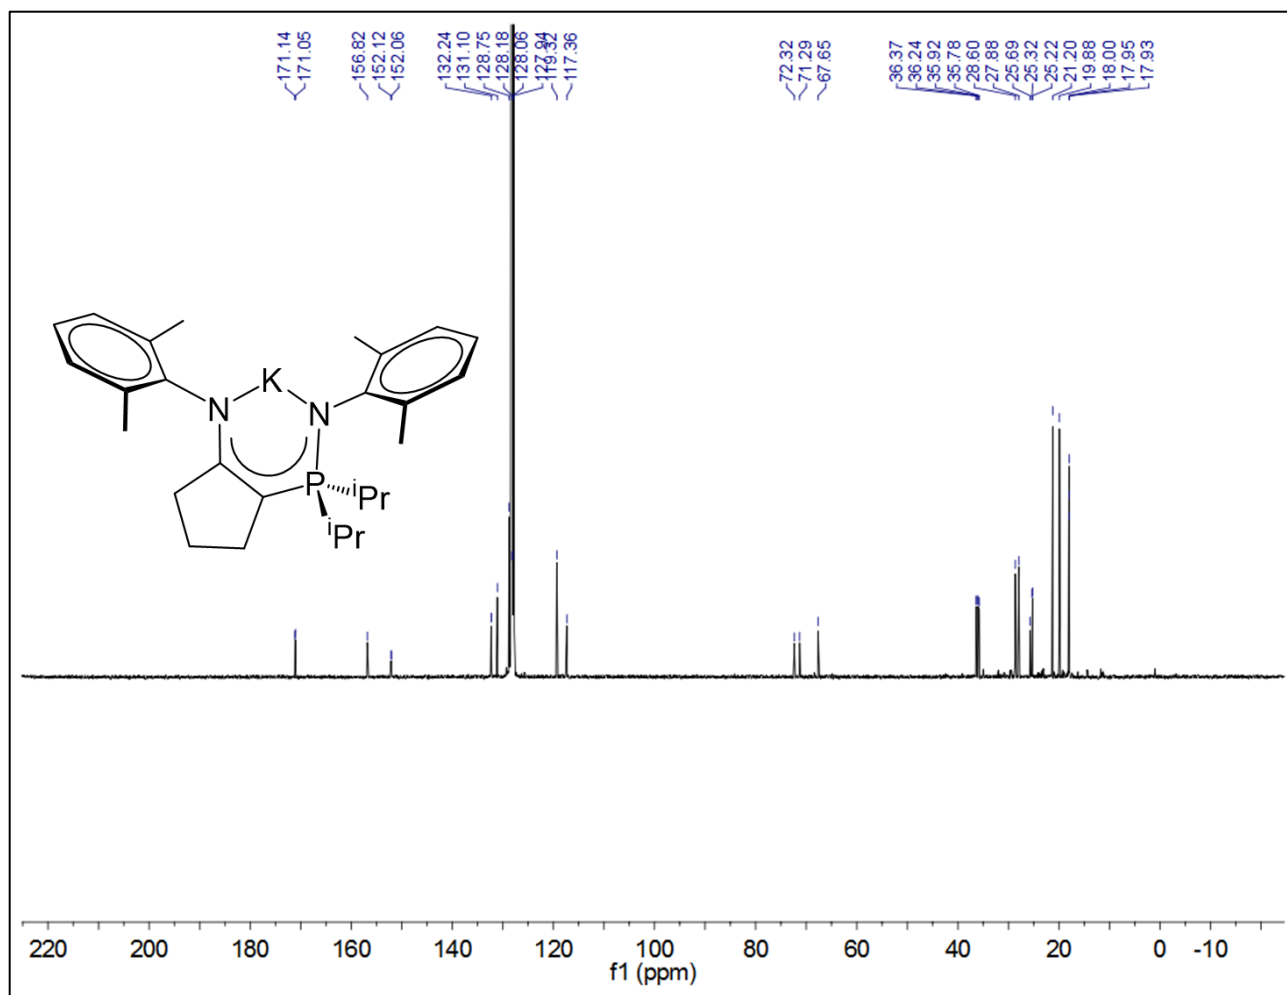

**Figure S17:**  $^{13}\text{C}\{^1\text{H}\}$  NMR spectrum for  $[\text{CY}^5\text{NpN}^{\text{DMP,DMP}}]\text{K}(\text{THF})_{0.25}$  **3b**  
 (101 MHz,  $d_6$ -benzene, 298 K).

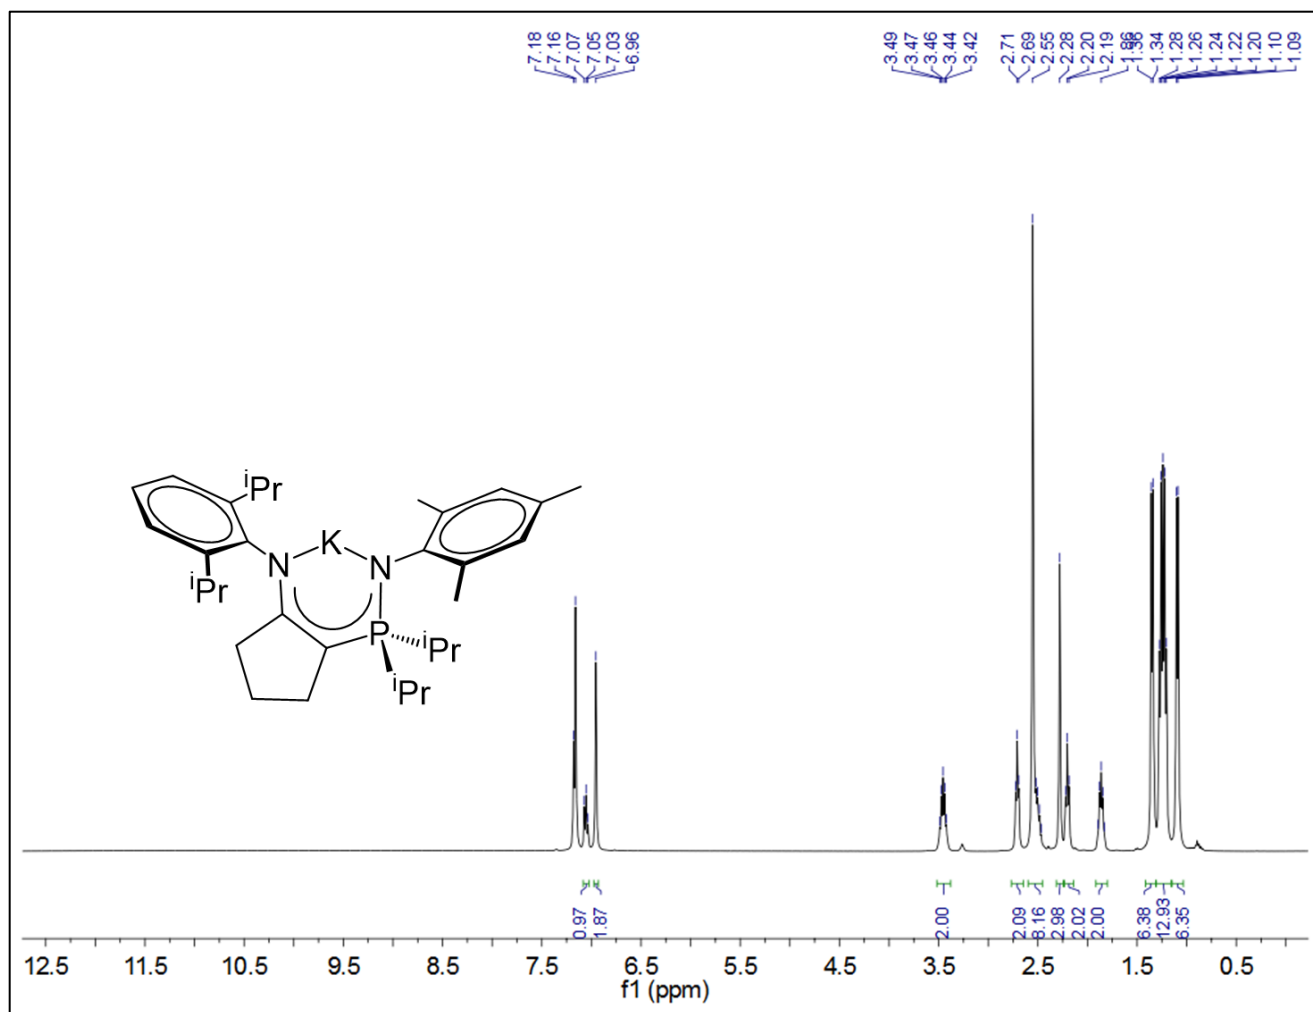

**Figure S18:**  $^1\text{H}$  NMR spectrum for  $[\text{CY}^5\text{NpN}^{\text{DIPP,Mes}}]\text{K}$  **3c** (400 MHz,  $d_6$ -benzene, 298 K).

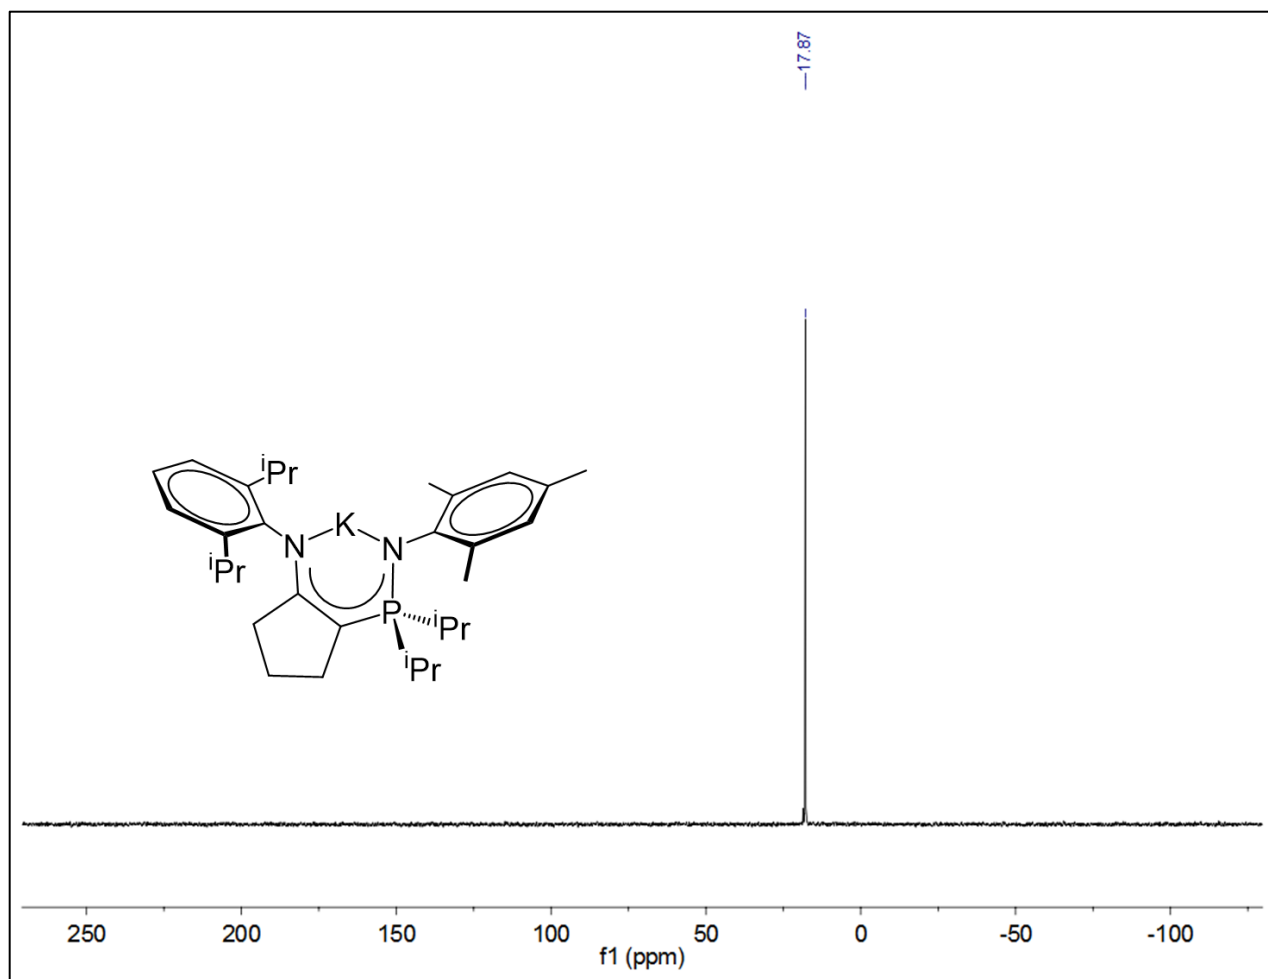

**Figure S19:**  $^{31}\text{P}\{^1\text{H}\}$  NMR spectrum for  $[\text{CY5NpN}^{\text{DIPP,Mes}}\text{K}] \mathbf{3c}$  (121 MHz,  $d_6$ -benzene, 298 K).

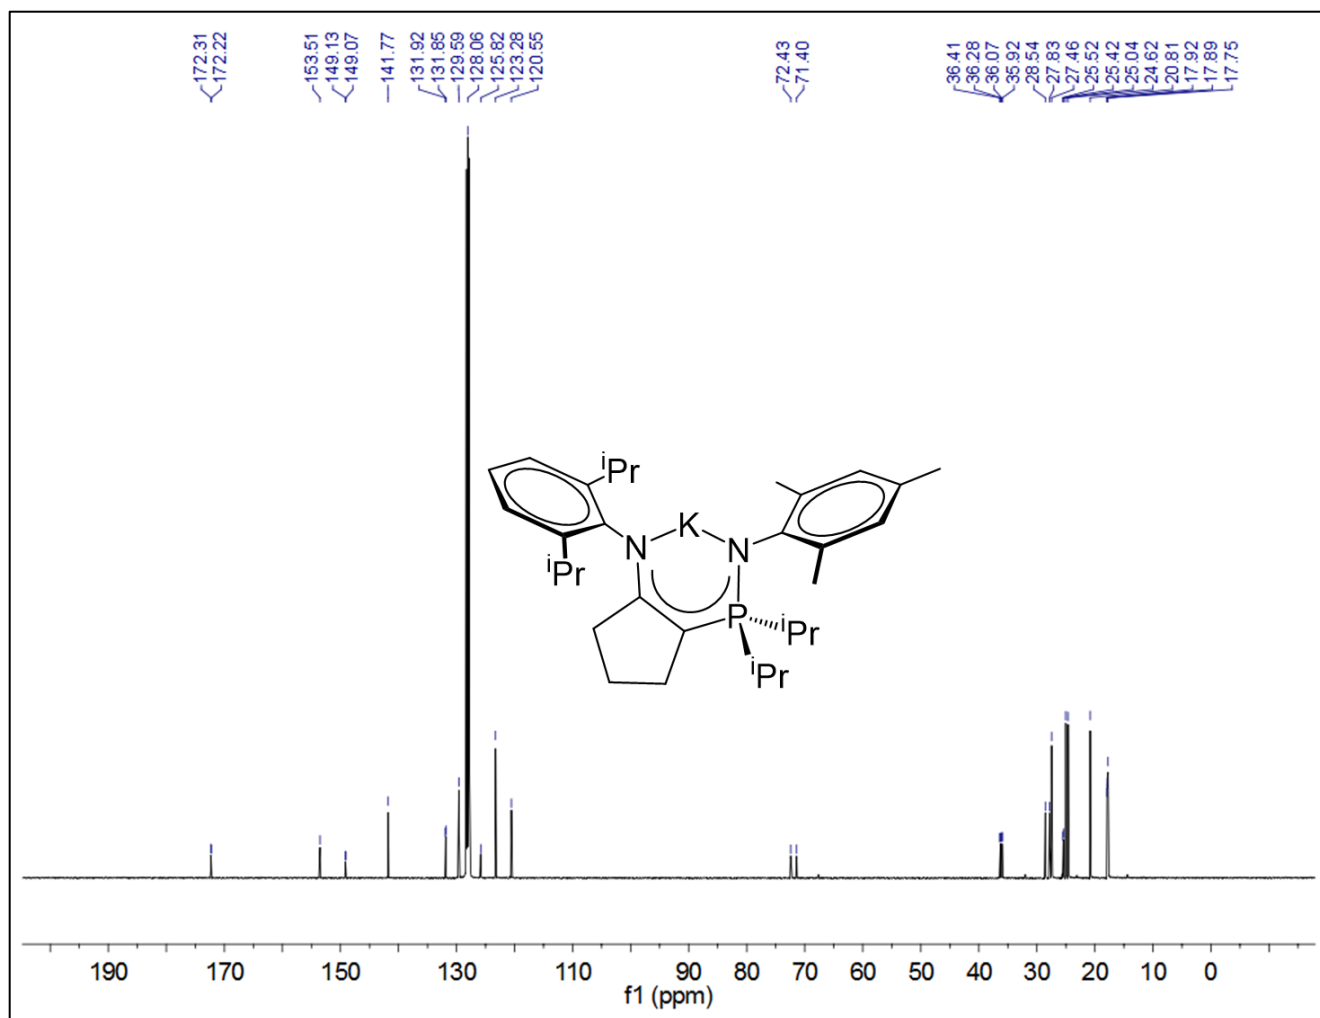

**Figure S20:**  $^{13}\text{C}\{^1\text{H}\}$  NMR spectrum for  $[\text{CY}^5\text{NpN}^{\text{DIPP,Mes}}]\text{K}$  3c (101 MHz,  $d_6$ -benzene, 298 K).

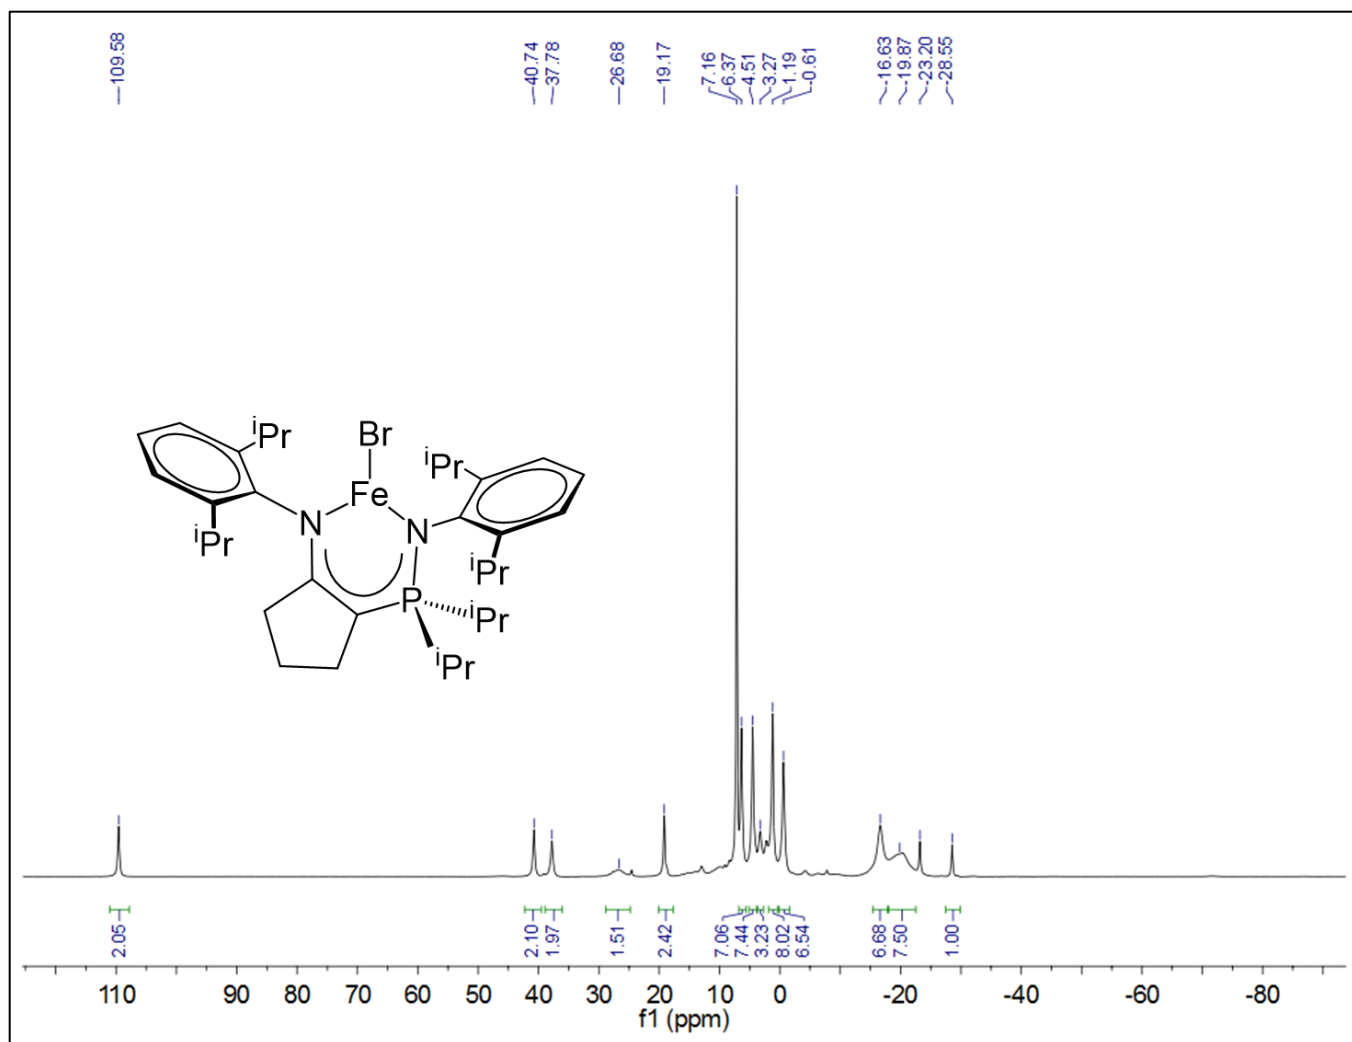

**Figure S21:**  $^1\text{H}$  NMR spectrum for  $[\text{CY}^5\text{NpN}^{\text{DIPP},\text{DIPP}}]\text{FeBr } \mathbf{4a}$  (300 MHz,  $d_6$ -benzene, 298 K).

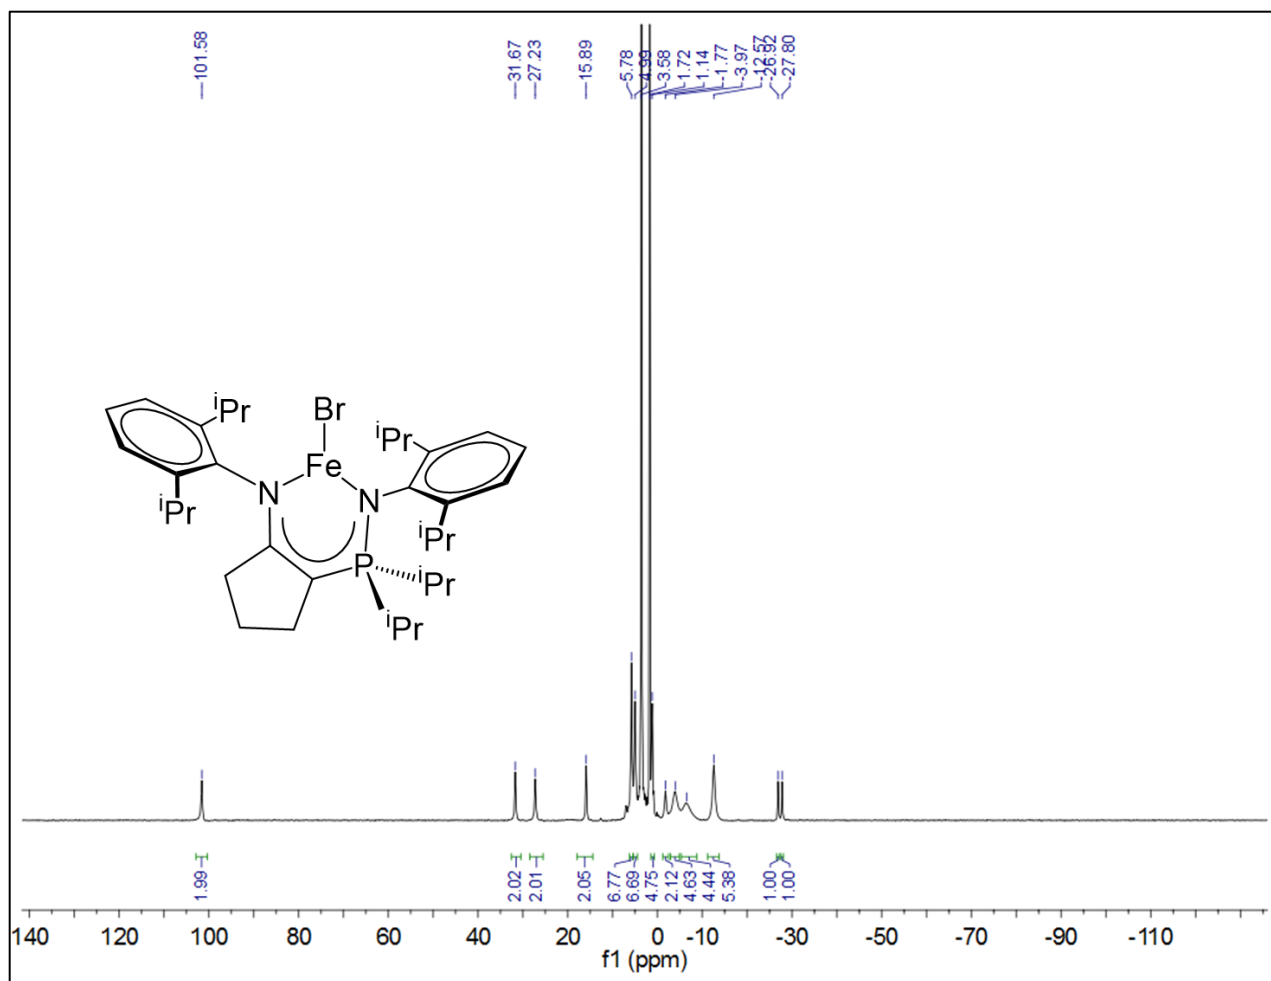

**Figure S22:**  $^1\text{H}$  NMR spectrum for  $[\text{CY}^5\text{NpN}^{\text{DIPP,DIPP}}]\text{FeBr}$  **4a** (400 MHz,  $d_8$ -THF, 298 K).

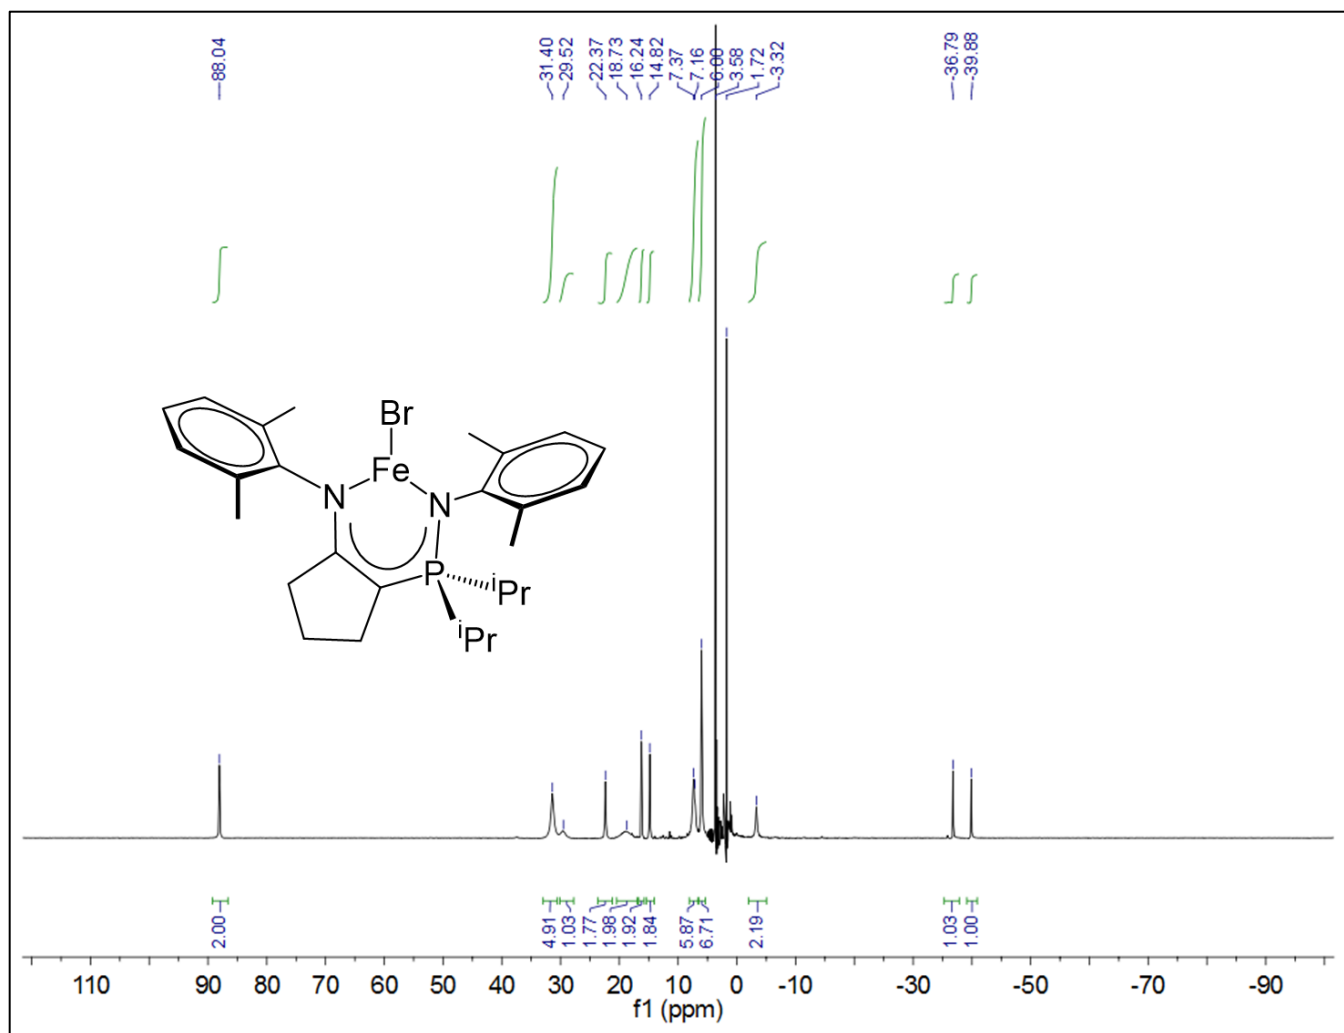

**Figure S23:**  $^1\text{H}$  NMR spectrum for  $[\text{CY}^5\text{NpN}^{\text{DMP,DMP}}]\text{FeBr } \mathbf{4b}$  (400 MHz,  $d_8$ -THF, 298 K).

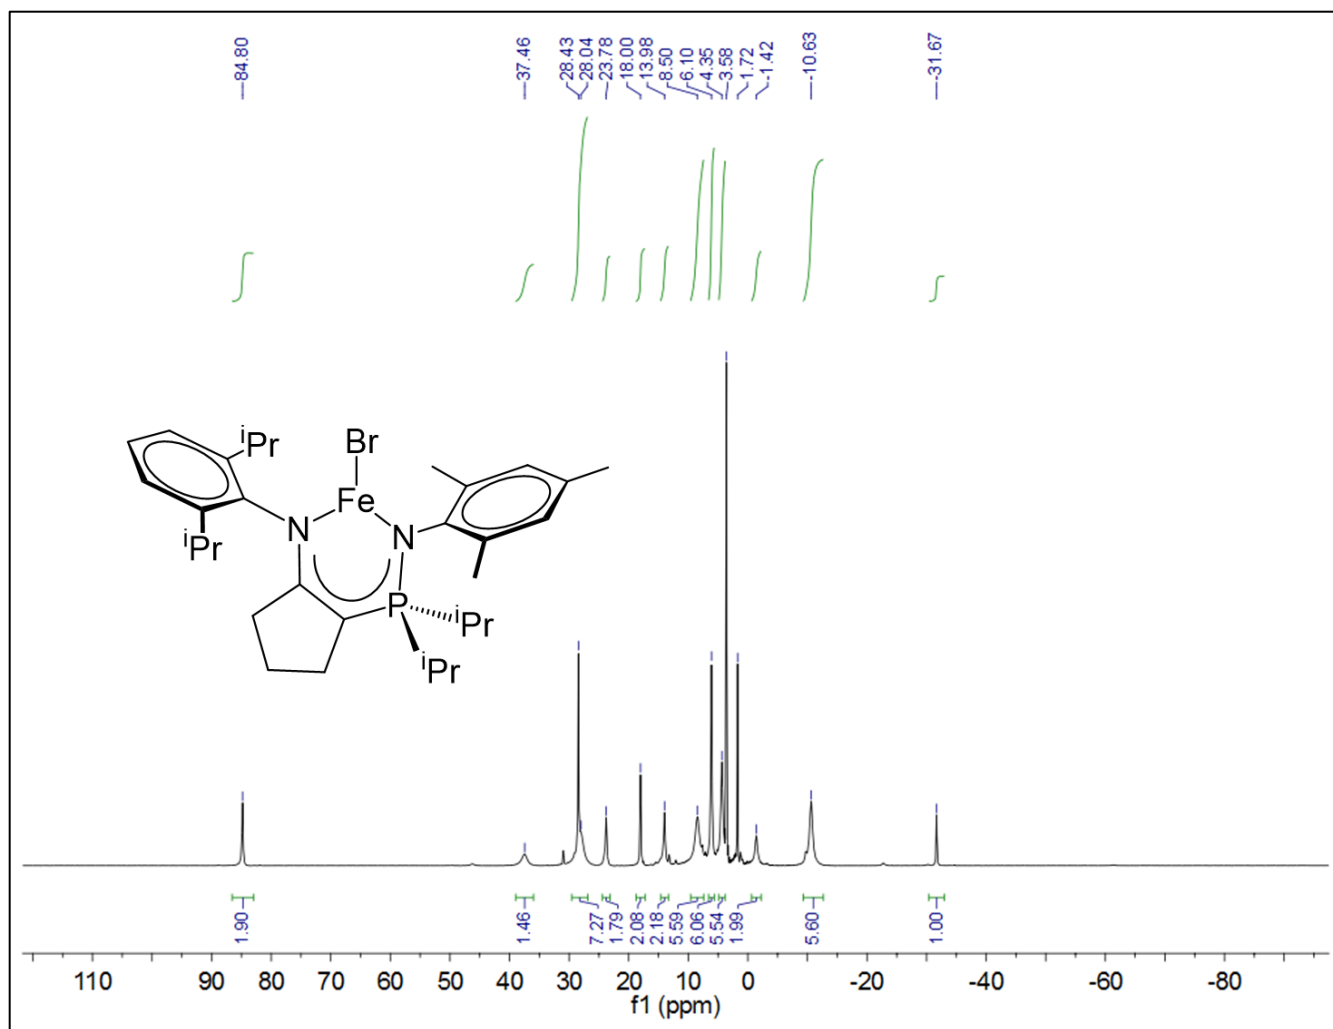

**Figure S24:**  $^1\text{H}$  NMR spectrum for  $(^{\text{CYP}}\text{NpN}^{\text{DIPP, Mes}})\text{FeBr}$  **5c** (300 MHz,  $d_8$ -THF, 298 K).



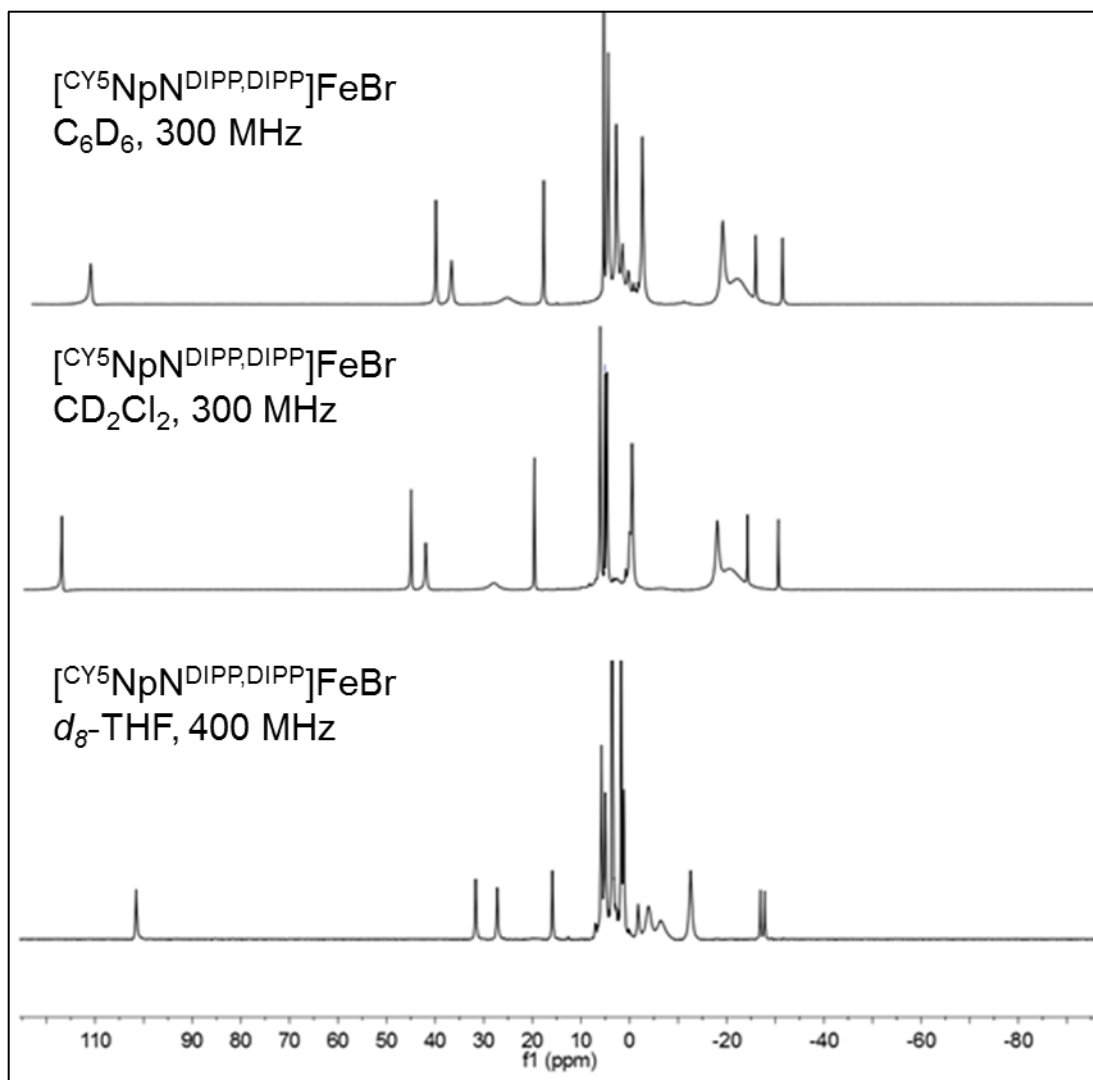

**Figure S25:**  $^1\text{H}$  NMR spectra for  $[\text{CY5NpN}^{\text{DIPP,DIPP}}]\text{FeBr}$  **4a** in  $d_6$ -benzene (top),  $d_2$ -DCM (middle), and  $d_8$ -THF (bottom).

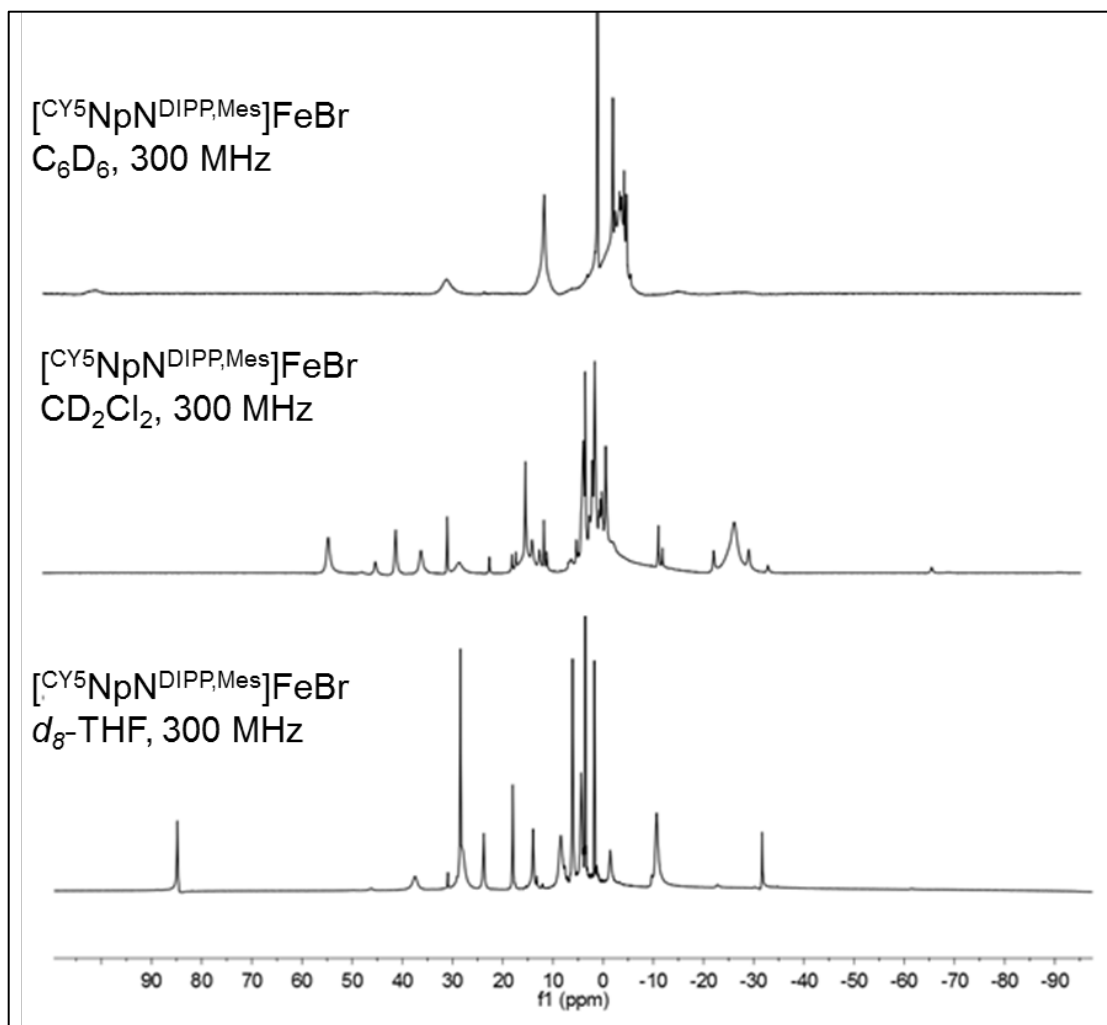

**Figure S26:** <sup>1</sup>H NMR spectra for  $[\text{CY5NpNDIPP,Mes}]\text{FeBr}$  **4c** in  $d_6$ -benzene (top),  $d_2$ -DCM, (middle) and  $d_8$ -THF (bottom).

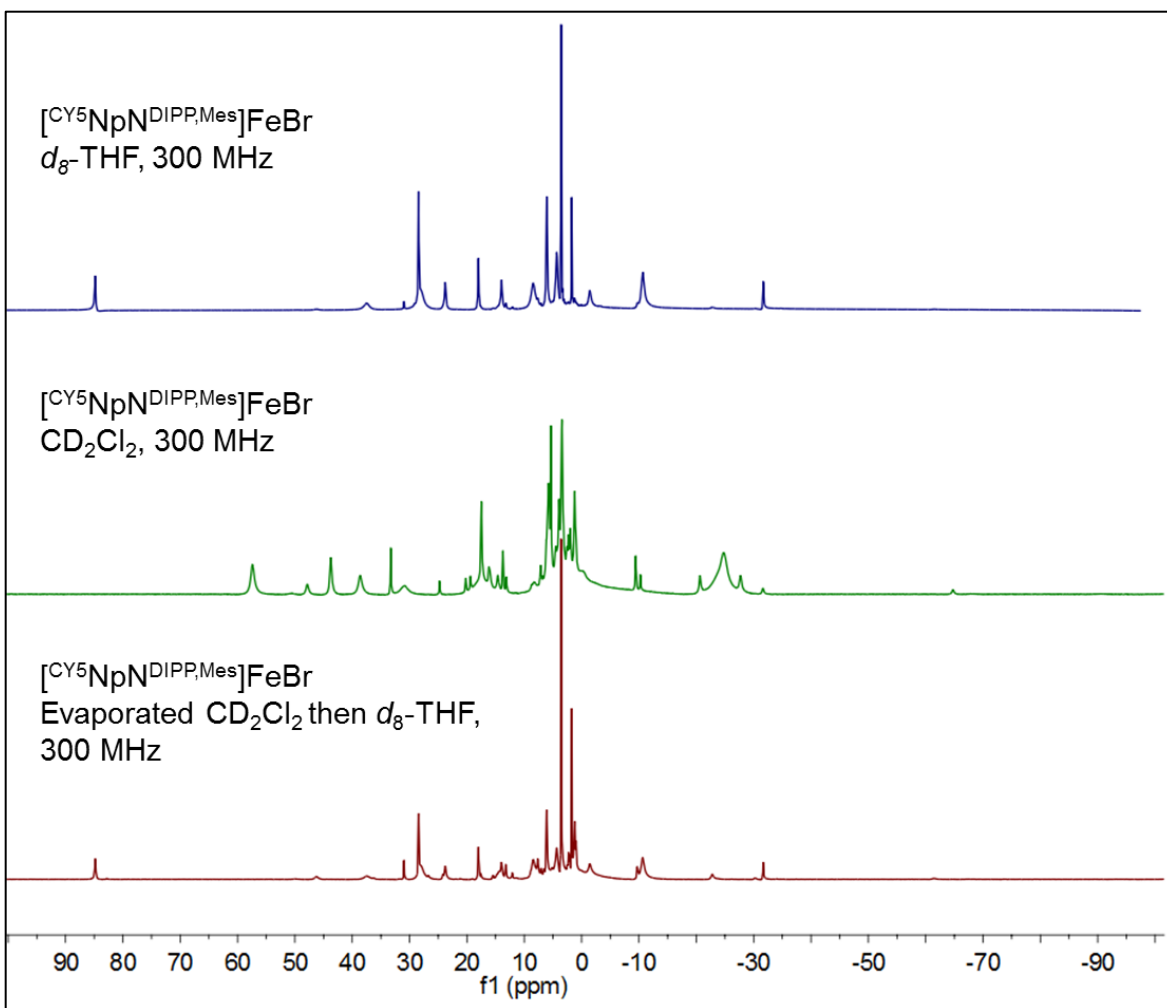

**Figure S27:**  $^1\text{H}$  NMR spectra for  $[\text{CY}^5\text{NpN}^{\text{DIPP,Mes}}]\text{FeBr}$  **4c** in  $d_8$ -THF (top),  $d_2$ -DCM (middle), and the  $d_2$ -DCM sample which was evaporated under vacuum and redissolved in  $d_8$ -THF (bottom).

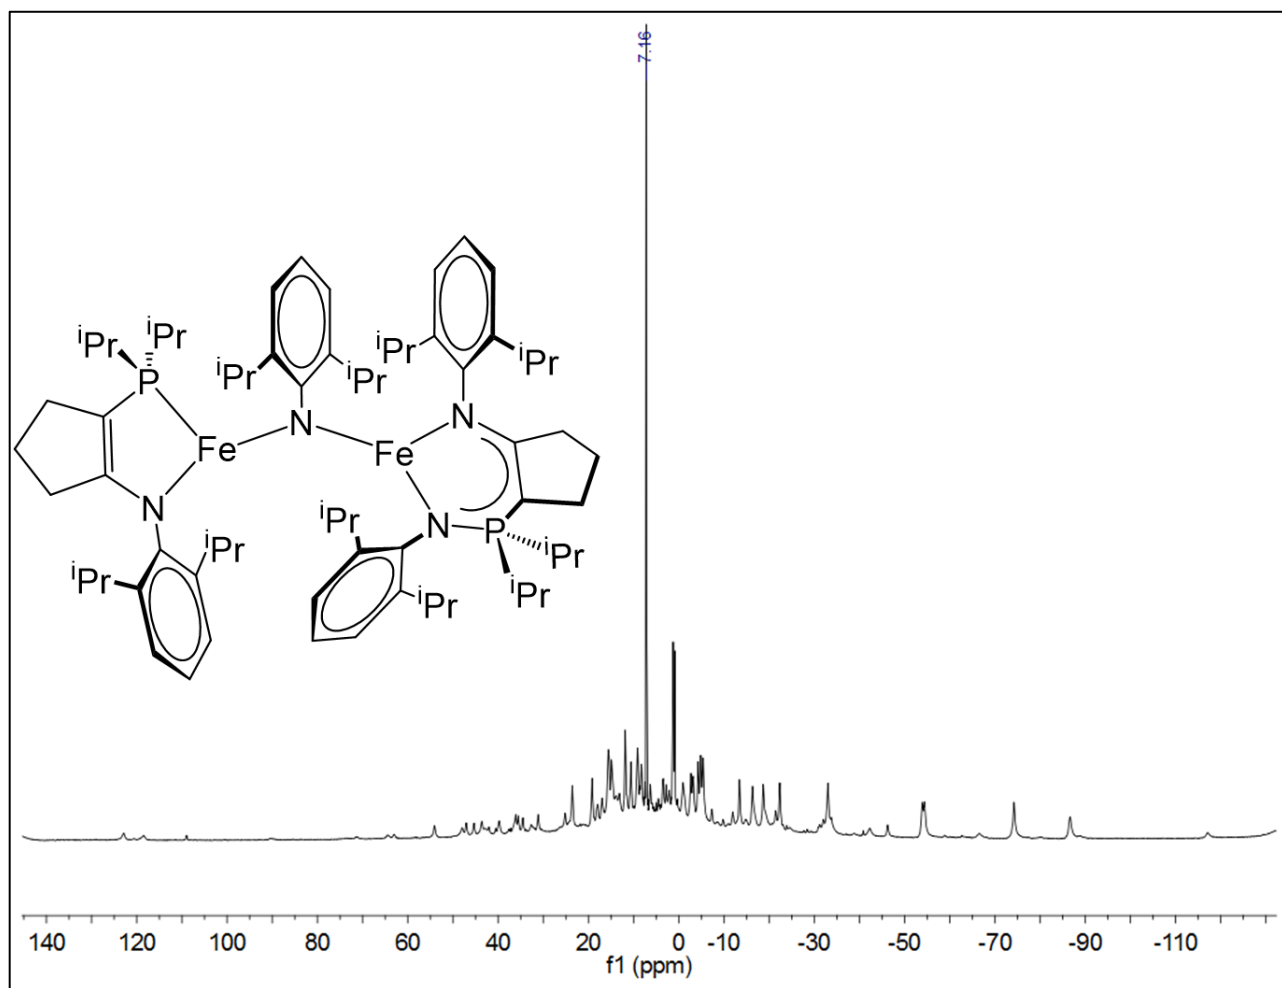

**Figure S28:**  $^1\text{H}$  NMR spectrum for  $[\text{CY}^5\text{NpN}^{\text{DIPP,DIPP}}]\text{Fe}(\mu\text{-N-DIPP})\text{Fe}[\text{CY}^5\text{NP}^{\text{DIPP}}]$  **6**  
 (300 MHz,  $d_6$ -benzene, 298 K).

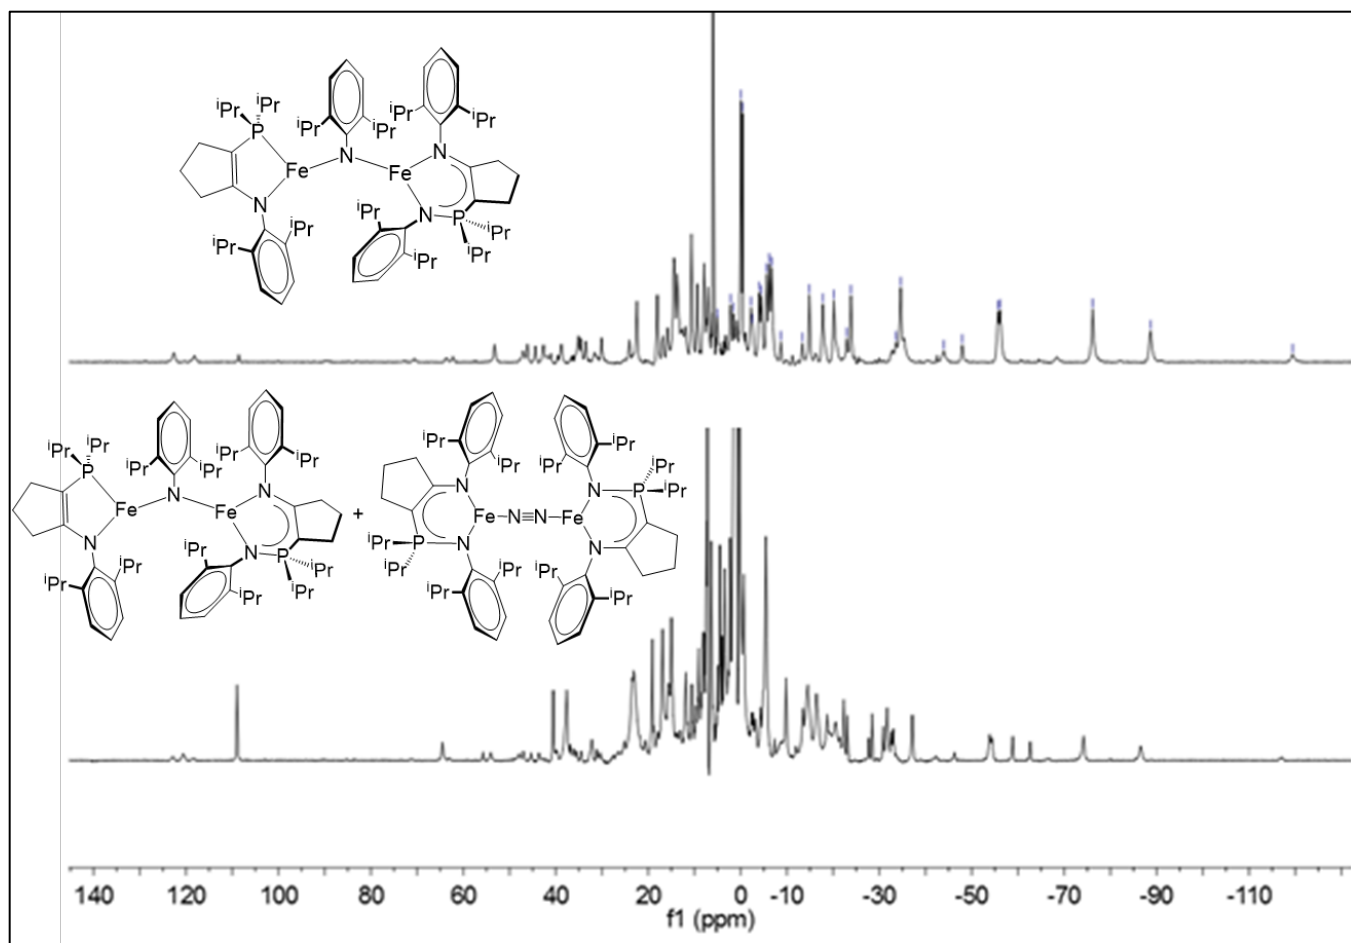

**Figure S29:**  $^1\text{H}$  NMR spectra for the mixture of products obtained from the reduction of  $(^{\text{CYP}}\text{NpN}^{\text{DIPP,DIPP}})\text{FeBr}$  **5a** with  $\text{KC}_8$  (bottom) and  $(^{\text{CYP}}\text{NpNFe}(\mu\text{-N-DIPP})\text{FeNP}^{\text{CYP}})$  **11** (top) (300 MHz,  $d_6$ -benzene, 298 K).

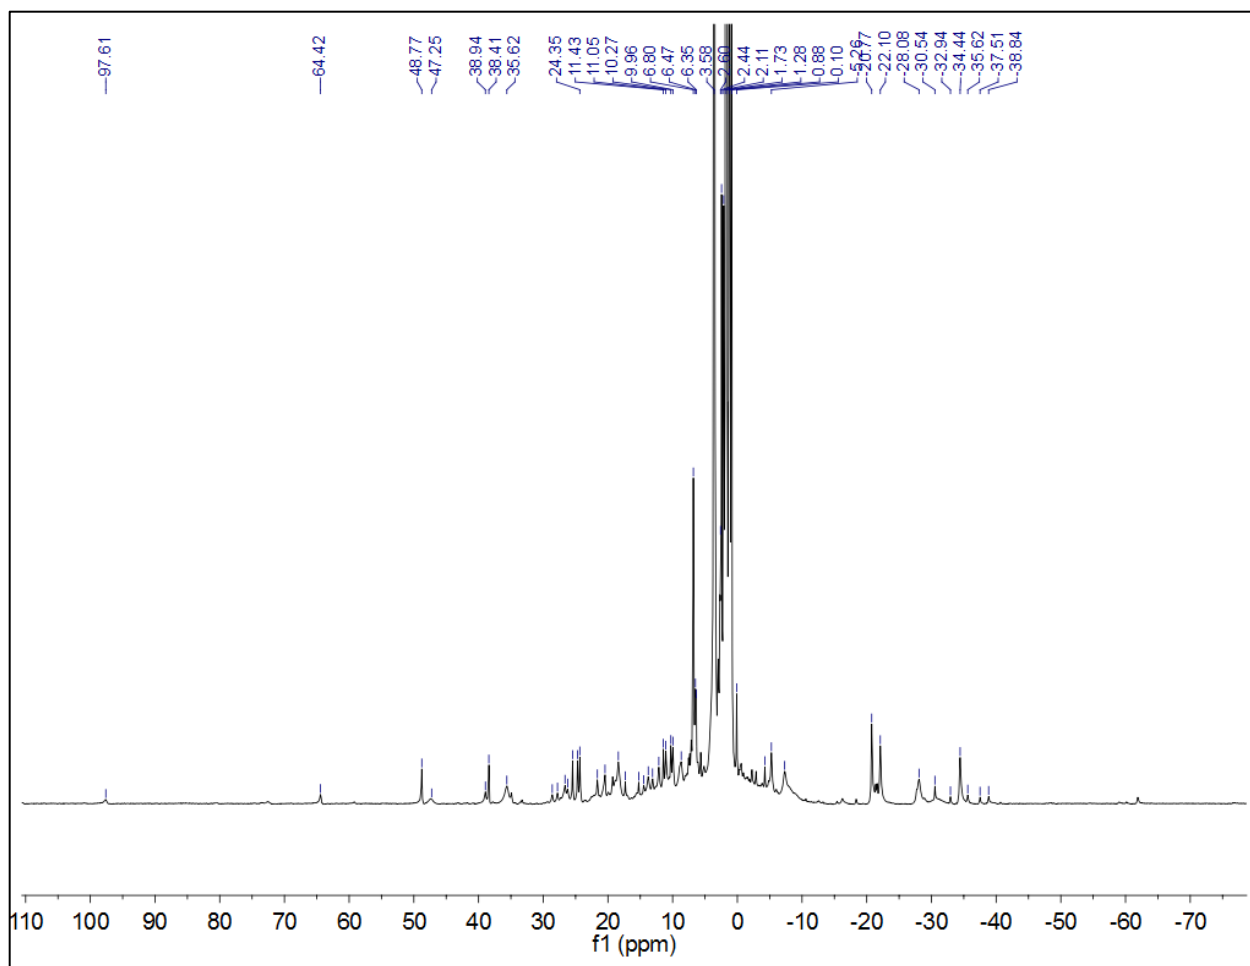

**Figure S30:**  $^1\text{H}$  NMR for product mixture that a crystal of  $([\text{CY}^5\text{NpN}^{\text{DMP,DMP}}][\text{CY}^5\text{NP}]\text{Fe})$  (5b) was picked from (400 MHz,  $d_8$ -THF, 298 K).

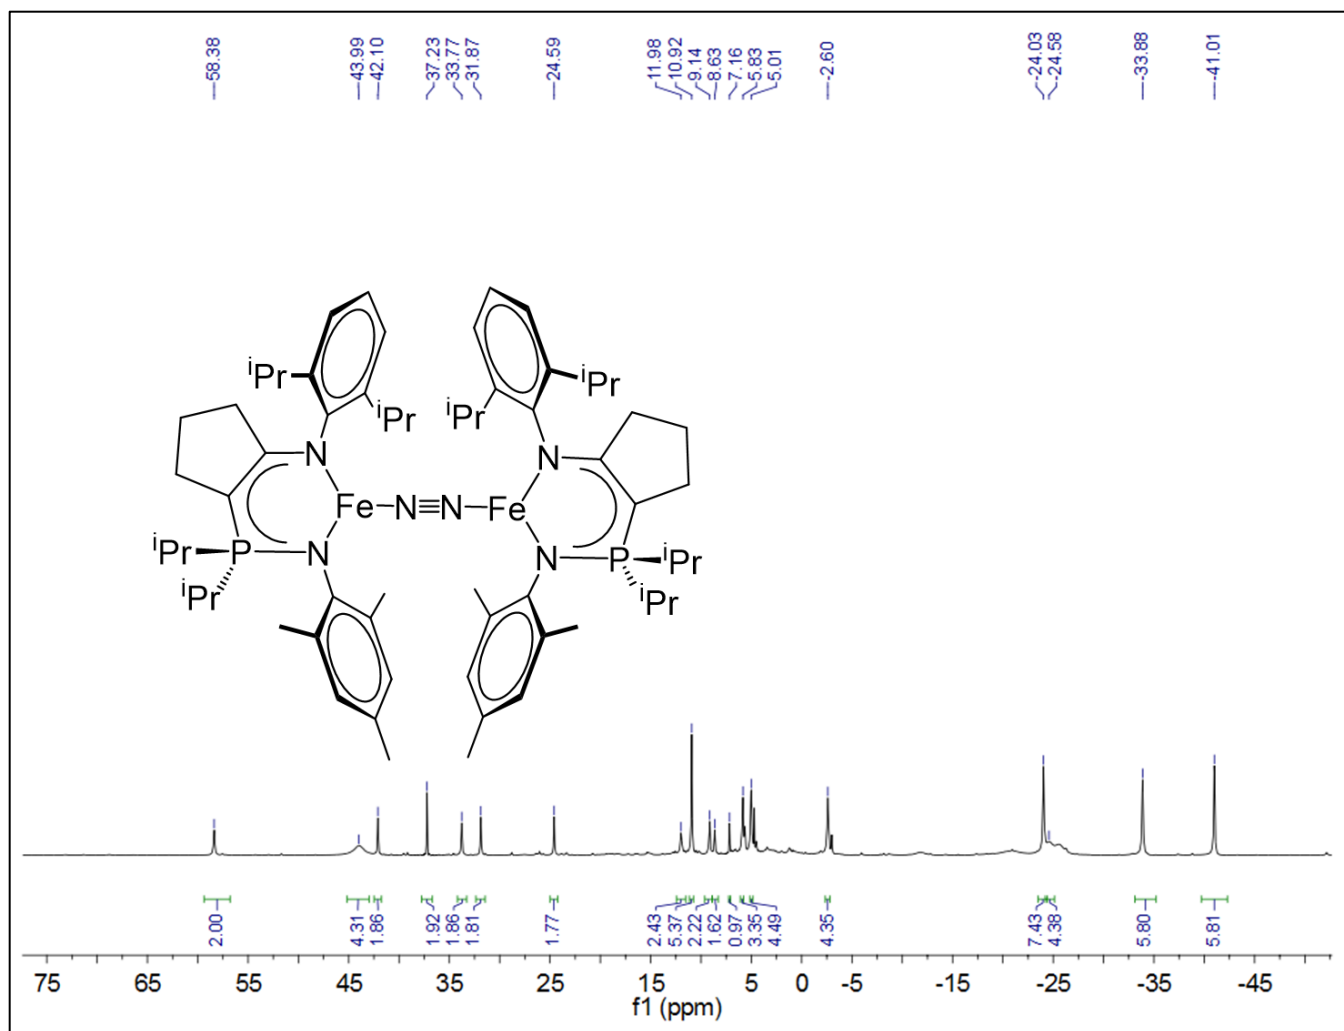

**Figure S31:**  $^1\text{H}$  NMR spectrum for  $[(\text{CYP}^{\text{NpN}}\text{N}^{\text{DIPP,Mes}})\text{Fe}]_2(\mu\text{-N}_2)$  (300 MHz,  $d_6$ -benzene, 298 K).

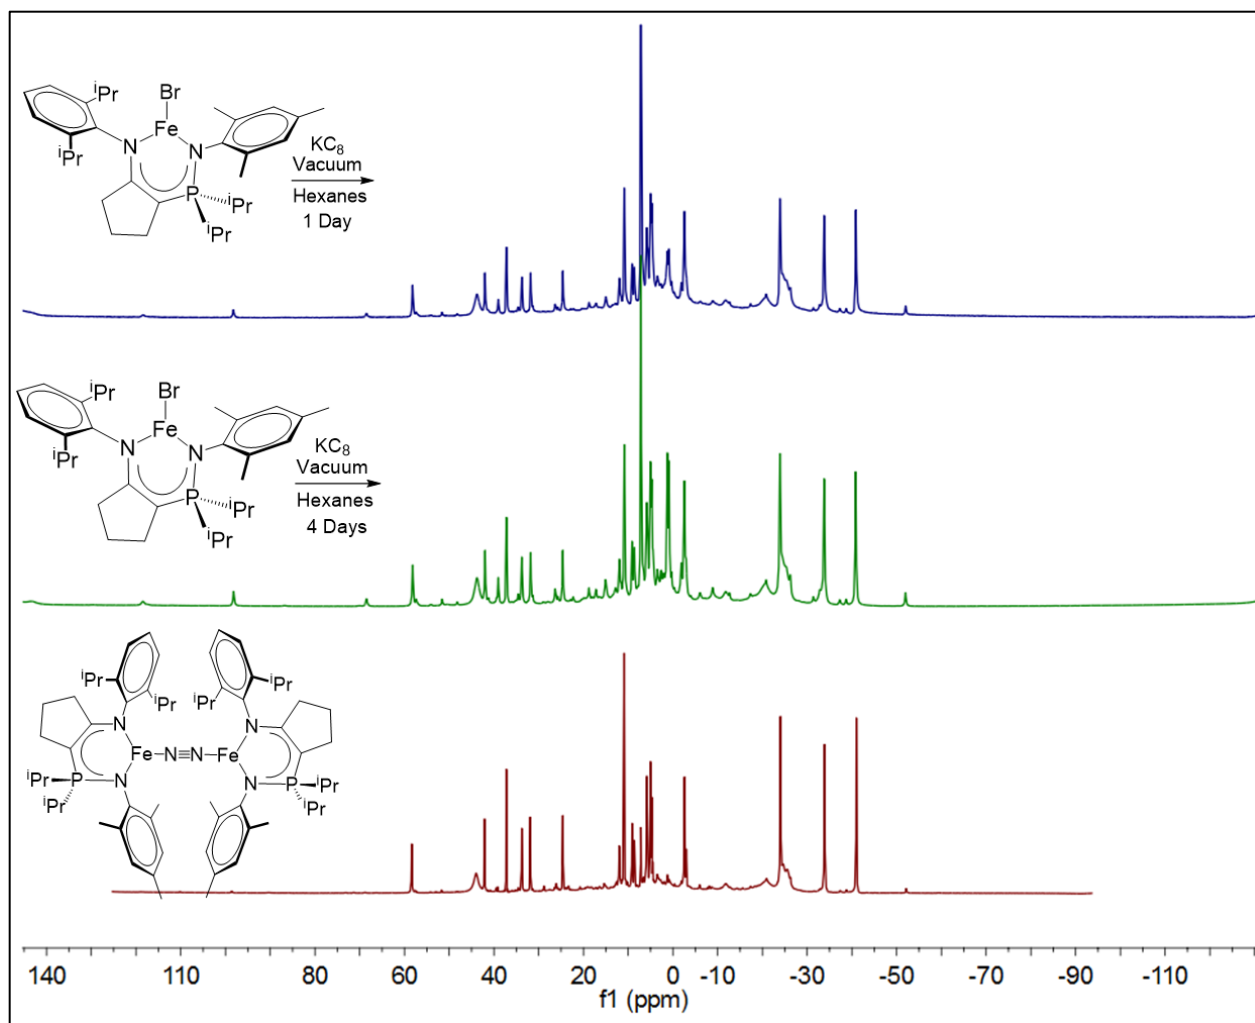

**Figure S32:**  $^1\text{H}$  NMR spectra for the reduction of **5c** under vacuum for 1 day (top) the reduction of **5c** under vacuum for 4 days (middle), and the spectrum for  $[(^{\text{CYP}}\text{NpN}^{\text{DIPP,Mes}})\text{Fe}]_2(\mu\text{-N}_2)$  (bottom). Impurities denoted with (\*). (300 MHz,  $d_6$ -benzene, 298 K).



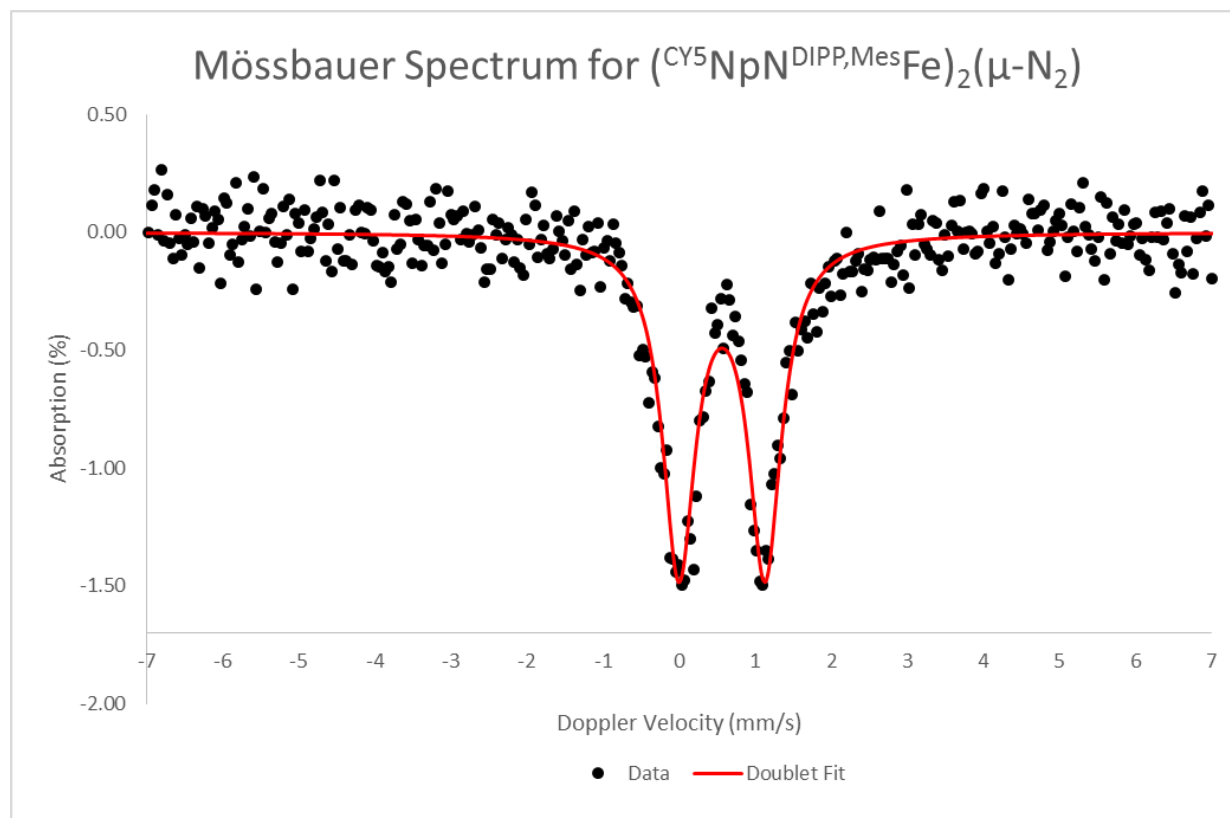

**Figure S33:** Zero-field  ${}^{57}\text{Fe}$  Mössbauer spectra for powdered samples of  $[({}^{\text{CYP}}\text{NpN}^{\text{DIPP,Mes}})\text{Fe}]_2(\mu\text{-N}_2)$  **5c** obtained at 295 K. The parameters used for the fit of **5c** (red line) were an isomer shift of ( $\delta$ ) 0.56 mm/sec and a quadrupole splitting ( $\Delta E_Q$ ) of 1.14 mm/sec.
